# 1        **Horizontal acquisition of a patchwork Calvin cycle by symbiotic** 2        **and free-living Campylobacterota (formerly Epsilonproteobacteria)**

3        Authors: Adrien Assié<sup>1,§,\*</sup>, Nikolaus Leisch<sup>1\*</sup>, Dimitri V. Meier<sup>1#</sup>, Harald Gruber-Vodicka<sup>1</sup>,  
4        Halina E. Tegetmeyer<sup>1,9</sup>, Anke Meyerdirks<sup>1</sup>, Manuel Kleiner<sup>2,3</sup>, Tjorven Hinzke<sup>2,4,5</sup>, Samantha  
5        Joye<sup>6</sup>, Matthew Saxton<sup>6</sup>, Nicole Dubilier<sup>1,7,§</sup> and Jillian M. Petersen<sup>1,8,§</sup>

6        1        Max Planck Institute for Marine Microbiology, Celsiusstrasse 1, D-28359 Bremen,  
7               Germany.  
8        2        Department of Geoscience, University of Calgary, Calgary, 2500 University Drive  
9               Northwest, Alberta T2N 1N4, Canada  
10       3        Department of Plant and Microbial Biology, North Carolina State University, Raleigh  
11              27695, North Carolina, USA  
12       4        Department of Pharmaceutical Biotechnology, University of Greifswald, Institute of  
13              Pharmacy, Greifswald D-17489, Germany  
14       5        Institute of Marine Biotechnology, Greifswald D-17489, Germany  
15       6        Department of Marine Sciences, The University of Georgia, Room 159, Marine  
16              Sciences Bldg. Athens, GA 30602-3636  
17       7        MARUM - Zentrum für Marine Umweltwissenschaften, University of Bremen,  
18              Leobener Str. 2, 28359 Bremen, Germany  
19       8        Department of Microbiology and Ecosystem Science, Research Network Chemistry  
20              Meets Microbiology, University of Vienna, Althanstrasse 14, 1090 Vienna, Austria.  
21       9        Center for Biotechnology, Bielefeld University, Universitaetsstrasse 27, 33615  
22              Bielefeld, Germany  
23       §        Current address: Baylor College of Medicine, One Baylor Plaza, Houston, Texas  
24              77030, United States.  
25       #        Current address: Division of Microbial Ecology, Department of Microbiology and  
26              Ecosystem Science, Research Network Chemistry Meets Microbiology, University of  
27              Vienna, Althanstrasse 14, 1090 Vienna, Austria.

28  
29       \* these authors contributed equally  
30

31       \$        Corresponding authors:

32       Adrien Assié        [Adrien.Assie@bcm.edu](mailto:Adrien.Assie@bcm.edu)        +1 713 1819156  
33       Nicole Dubilier     [ndubilie@mpi-bremen.de](mailto:ndubilie@mpi-bremen.de)       +49 421 2028-932  
34       Jillian M. Petersen [petersen@microbial-ecology.net](mailto:petersen@microbial-ecology.net)   +43 1 4277 76606

35

## 36 **Abstract**

37 Although the majority of known autotrophs use the Calvin-Benson-Bassham (CBB) cycle for  
38 carbon fixation, all currently described autotrophs from the Campylobacterota (previously  
39 Epsilonproteobacteria) use the reductive tricarboxylic acid cycle (rTCA) instead. We  
40 discovered campylobacterotal epibionts ("*Candidatus Thiobarba*") of deep-sea mussels that  
41 have acquired a complete CBB cycle and lost key genes of the rTCA cycle. Intriguingly, the  
42 phylogenies of campylobacterotal CBB genes suggest they were acquired in multiple  
43 transfers from Gammaproteobacteria closely related to sulfur-oxidizing endosymbionts  
44 associated with the mussels, as well as from Betaproteobacteria. We hypothesize that  
45 "*Ca. Thiobarba*" switched from the rTCA to a fully functional CBB cycle during its evolution,  
46 by acquiring genes from multiple sources, including co-occurring symbionts. We also found  
47 key CBB cycle genes in free-living Campylobacterota, suggesting that the CBB cycle may be  
48 more widespread in this phylum than previously known. Metatranscriptomics and  
49 metaproteomics confirmed high expression of CBB cycle genes in mussel-associated  
50 "*Ca. Thiobarba*". Direct stable isotope fingerprinting showed that "*Ca. Thiobarba*" has typical  
51 CBB signatures, additional evidence that it uses this cycle for carbon fixation. Our discovery  
52 calls into question current assumptions about the distribution of carbon fixation pathways  
53 across the tree of life, and the interpretation of stable isotope measurements in the  
54 environment.

## 55 **Introduction**

56 All life on earth is based on carbon fixation, and its molecular machinery is increasingly  
57 becoming a focus of biotechnology and geo-engineering efforts due to its potential to  
58 improve crop yields and sequester carbon dioxide from the atmosphere<sup>1</sup>. Seven carbon  
59 fixation pathways have evolved in nature, and one purely synthetic pathway runs in vitro<sup>2-4</sup>.  
60 Of the six natural pathways, the Calvin-Benson-Bassham (CBB) cycle was the first  
61 discovered, and is believed to be the most widespread<sup>5-7</sup>. The CBB cycle is used by a  
62 diverse array of organisms throughout the tree of life, including plants and algae,  
63 cyanobacteria, and autotrophic members of the Alpha-, Beta- and Gammaproteobacteria. Its  
64 key enzyme, the ribulose biphosphate carboxylase/oxygenase (RuBisCO) is thought to be  
65 the most abundant, as well as one of the most ancient enzymes on Earth<sup>8,9</sup>.

66 The reductive tricarboxylic acid (rTCA) cycle was the second described carbon fixation  
67 pathway<sup>10</sup>. In short, it is a reversal of the energy-generating and oxidative TCA cycle. Instead  
68 of oxidizing acetyl-CoA and generating ATP and reducing equivalents, it reduces CO<sub>2</sub> at the  
69 expense of ATP and reducing equivalents<sup>2,7,10</sup>. Most of the enzymes are shared with the TCA  
70 cycle, except for those that catalyze irreversible reactions in the TCA, such as citrate  
71 synthase, which is catalyzed by ATP citrate lyase in the rTCA. However, given sufficiently  
72 high reactant to product ratios and enzyme concentrations, the citrate synthase reaction can  
73 be reversed to run the TCA cycle reductively, without any additional enzymes<sup>11,12</sup>. The rTCA  
74 pathway is widely distributed in nature, and has been described in diverse lineages of  
75 anaerobes and microaerobes such as the Chlorobi, Aquificae, Nitrospirae and is also  
76 commonly observed among the Proteobacteria, including the Deltaproteobacteria and the  
77 Campylobacterota, (formerly Epsilonproteobacteria)<sup>13,14</sup>. It is particularly prominent in the  
78 Campylobacterota, as all previously described autotrophic members of this class use the  
79 rTCA pathway for CO<sub>2</sub> fixation<sup>2,13</sup>.

80 Carbon fixation by chemoautotrophic microorganisms forms the basis of entire ecosystems  
81 at deep-sea hydrothermal vents and cold seeps<sup>15,16</sup>. Most of this carbon is fixed either via  
82 the CBB cycle, used by many gammaproteobacterial autotrophs, or the rTCA cycle, used by  
83 campylobacterotal autotrophs. This difference is reflected by the different niches colonized  
84 by these organisms at hydrothermal vents and seeps, with Gammaproteobacteria typically  
85 dominating habitats with higher oxygen and lower sulfide concentrations where the CBB  
86 cycle would be more efficient, and Campylobacterota typically thriving at lower oxygen and  
87 higher sulfide concentrations where the rTCA cycle could provide a selective advantage<sup>17–23</sup>.  
88 Experimental studies have linked substrate preferences in cultured Gammaproteobacteria  
89 and Campylobacterota to these ecological distributions<sup>24–26</sup>. Symbiotic invertebrates at  
90 hydrothermal vents and cold seeps associate with either gammaproteobacterial or  
91 campylobacterotal endosymbionts, which they rely on for most of their nutrition<sup>27,28</sup>. Some  
92 vent and seep invertebrates associate with both gammaproteobacterial and  
93 campylobacterotal symbionts simultaneously, which raises the question of how these co-  
94 occurring symbionts with differing habitat preferences can both be provided with suitable  
95 conditions<sup>27,29,30</sup>.

96 Bathymodiolin mussels, a subfamily of mytilid bivalves, are found at most  
97 hydrothermal vents and cold seeps<sup>31</sup>. They have evolved mutualistic relationships with  
98 chemosynthetic bacteria, allowing them to colonize these extreme environments. Inside their  
99 gills, they host intracellular sulfide- or methane-oxidizing gammaproteobacterial  
100 endosymbionts. Many bathymodiolin species host both types in a 'dual symbiosis'. Assié et  
101 al. recently discovered a novel family of Campylobacterota, which colonizes bathymodiolin  
102 mussels from around the world<sup>32</sup>. In contrast to the gammaproteobacterial endosymbionts of  
103 these mussels that are harbored inside gill cells called bacteriocytes, these  
104 Campylobacterota are filamentous epibionts that colonize the surface of the gill epithelia in  
105 dense patches.

106 In this study, we used a multi-omics approach to investigate the metabolism of these  
107 novel epibionts in two different species of bathymodiolin mussels. Surprisingly, the epibionts  
108 have, and express, all the genes required for the CBB cycle but are missing key genes of the  
109 rTCA cycle. These CBB cycle genes were most likely acquired by horizontal gene transfer  
110 from diverse sources. With a recently developed, highly sensitive, direct stable isotope  
111 fingerprinting technique<sup>33</sup>, we show that the proteins of these epibionts have an isotopic  
112 signature typical of the CBB cycle, further demonstrating its importance for the metabolism  
113 of these epibionts. The discovery of Campylobacterota that employ the CBB cycle for CO<sub>2</sub>  
114 fixation has wide-reaching implications for understanding the evolution of carbon fixation  
115 pathways, and for interpreting stable isotope values in environmental samples.

## 116 **Main text**

### 117 **Genome assemblies and annotations**

118 We assembled Campylobacterota draft genomes from gill metagenomes of two  
119 mussel species: "*B.*" *childressi* and *B. azoricus*. The draft genome from "*B.*" *childressi* was  
120 2.2 Mb, and estimated to be 95% complete. It had 30% GC, 2204 predicted protein-coding  
121 genes and 31 tRNA-encoding genes. The draft genome from *B. azoricus* was estimated to  
122 be 92% complete at 2.3 Mb. It had 30% GC, 2155 predicted protein-coding genes and 37  
123 tRNAs (Table S1). The draft genomes had an average nucleotide sequence identity (ANI) of  
124 83.1%, indicating that they represent different species belonging to the same genus<sup>34–37</sup>.

125 Previous 16S ribosomal RNA gene (16S rRNA) sequence analysis identified this  
126 group of epibionts as a novel family-level deep-branching sister group of the *Sulfurovum*  
127 clade within the Campylobacterota<sup>32</sup>. The Campylobacterota draft genome from "*B.*"  
128 *childressi* contained a partial 16S rRNA sequence (586 bp) that was 100% identical to the  
129 epibiont sequence previously published<sup>32</sup>. The 16S rRNA sequence identity and the ANI  
130 information allowed us to link the two draft genomes to the previously described epibiont<sup>32</sup>.

131 To better resolve the relationships of the mussel epibionts to other Campylobacterota we  
132 analyzed a set of 18 conserved marker genes from the two epibiont draft genomes and other  
133 publicly available Campylobacterota genomes (Figure S1). In contrast to the previous 16S  
134 rRNA based phylogeny<sup>32</sup>, our analysis placed the mussel epibionts on a long branch, basal  
135 to the main Campylobacterota families. The long-branch formation for the genomes  
136 presented in this study is likely related to low amino acid sequence identity (AAI) values  
137 between these and the Campylobacterota representative genomes. AAI values were below  
138 48% when comparing the Campylobacterota bins found in our bathymodiolin samples with  
139 their closest relative genomes, *Sulfurospirillum arcachonense* and *Arcobacter anaerophilus*  
140 (Supplementary Table 2). According to the guidelines of Rodriguez and Konstantinidis<sup>36</sup>,  
141 organisms with AAI values higher than 30% and lower than 55-60% are likely to belong to  
142 the same division, but not the same genus. This is corroborated on the 16S rRNA level<sup>37</sup>,  
143 where our genomic data supports the previously published 16S rRNA based study<sup>32</sup>,  
144 indicating that the epibiont species belong to a novel family of Campylobacterota.

145 We therefore propose the new *Candidatus* family “Thiobarbaceae”  
146 (Campylobacterales, Campylobacterota), with the name composed of “*Thio-*” from the Greek  
147 word θεῖον, theïon for sulfur and “*barba*” from the Latin word for beard. The proposed family  
148 includes the novel *Candidatus* genus “Thiobarba” with two *Candidatus* species “*Ca. T.*  
149 *azoricus*” and “*Ca. T. childressi*”, for the two epibiont species in reference to their respective  
150 hosts, *B. azoricus* and *B. childressi*. For more details on the aetiology see Supplementary  
151 note 1.

## 152 **Unexpected carbon fixation pathways of “*Candidatus* Thiobarba spp.”**

153 Considering their phylogenetic relationship to free-living chemolithoautotrophic and  
154 mixotrophic Campylobacterota and their presence in sulfide-rich environments, we searched  
155 the epibiont draft genomes for metabolic pathways indicative of heterotrophy, autotrophy and  
156 sulfur oxidation. Both “*Ca. Thiobarba*” genomes encoded all the genes for the SOX multi-

157 enzyme pathway of sulfur oxidation, and are thus capable of lithotrophy using reduced sulfur  
 158 compounds as electron donors (Figure 1). Like other sulfur-oxidizing Campylobacterota, they  
 159 also appear capable of heterotrophic growth as their genomes contained a TCA cycle and a  
 160 partial glycogenesis/glycolysis pathway (Supplementary note 2 and Figure S2).

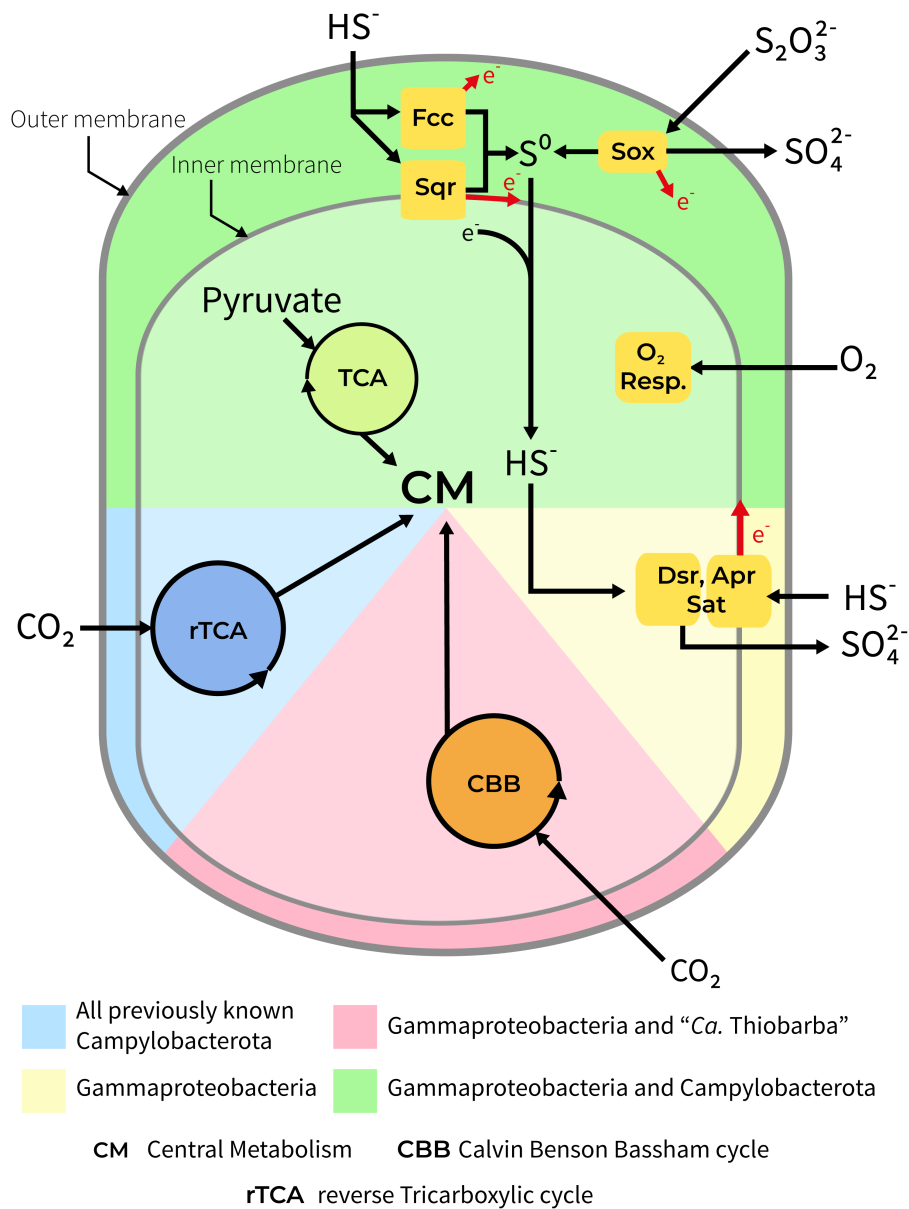

161

162 **Figure 1.** “*Ca. Thiobarba* spp.” share metabolic features of Gammaproteobacteria and  
163 Campylobacterota. Figure shows overview of the main metabolic pathways for energy  
164 generation and carbon fixation in known chemosynthetic Gammaproteobacteria and  
165 Campylobacterota compared to the metabolism of “*Ca. Thiobarba* spp.”.  
166

167 All previously described sulfur-oxidizing Campylobacterota use the reverse TCA  
168 cycle for carbon fixation<sup>2</sup>. All of these bacteria have genes encoding the enzymes for this  
169 cycle including the pyruvate: ferredoxin oxidoreductase genes *porABCD*, the 2-oxoglutarate  
170 oxidoreductase genes *oorABDG*, and the ATP citrate lyase genes *acIAB*. Unexpectedly, we  
171 could not find most of these genes in the “*Ca. Thiobarba*” genomes. The “*Ca. T. childressi*”  
172 draft genome contained only the *porAB* genes, and the “*Ca. T. azoricus*” draft genome  
173 contained *porABCD* and *acIA*, but not the *oorABDG* genes. To confirm that these genes  
174 were not missing because of errors in assembly, binning or annotation, we searched the  
175 genomes and unbinned metagenome assemblies with BLAST. No additional rTCA cycle  
176 genes could be found in the draft genomes or in the entire “*B.*” *childressi* metagenome  
177 assembly (Supplementary note 3). The absence of rTCA cycle genes suggests that either a)  
178 the epibionts never had a complete rTCA cycle, or b) it has been lost over the course of  
179 evolution. The additional roles of the *por* genes in other metabolic pathways, such as  
180 pyruvate fermentation, could explain why these are present, at least in part, in both  
181 lineages<sup>38</sup>.

182 Although the rTCA cycles were incomplete, both “*Ca. Thiobarba*” genomes contained  
183 all the genes required for carbon fixation via the CBB cycle (Figure 1). Most CBB cycle  
184 enzymes are used in other metabolic pathways, and are thus also found in heterotrophic  
185 bacteria, but two enzymes are unique to the cycle: Phosphoribulokinase (PRK) and ribulose  
186 1,5-bisphosphate carboxylase/oxygenase (RuBisCO)<sup>2</sup>. In both “*Ca. Thiobarba*” species, 9  
187 out of the 12 genes encoding PRK, RuBisCO and accessory proteins were grouped in two  
188 clusters, while three additional genes for the CBB cycle were scattered on separate contigs  
189 (Figure S3). The first cluster consisted of the RuBisCO Form I large and small subunits (*rbcL*



190 and *rbcS*), a conserved hypothetical protein, and the RuBisCO activation protein *cbbQ*. The  
191 order of these genes was conserved in both epibionts (Figure S4). “*Ca. T. childressi*” had an  
192 additional gene encoding the RuBisCO activation protein *cbbO* in this first cluster. In the  
193 “*Ca. T. azoricus*” genome, this gene was located on a separate contig. The second cluster  
194 included the genes coding for fructose-1,6-bisphosphatase, PRK, transketolase,  
195 phosphoglycolate phosphatase (not known to be involved in the CBB cycle), fructose-  
196 bisphosphate aldolase and ribulose-phosphate 3-epimerase (Figure S3). The order of the  
197 second gene cluster was consistent in both epibiont genomes, but the gene neighborhoods  
198 surrounding this cluster differed (Figure S4).

### 199 **CBB cycle expression in “*Ca. Thiobarba childressi*”**

200 To confirm expression of the CBB cycle by the epibionts, we analyzed the  
201 metatranscriptomes and -proteomes of “*B.*” *childressi*, the mussel species with the highest  
202 abundance of these epibionts<sup>32</sup>. We found that all CBB cycle genes were expressed in the  
203 transcriptomes, including the *rbcL* and *rbcS*, which were among the most highly expressed  
204 genes of this epibiont (Table 1). Although “*Ca. T. childressi*” was present in relatively low  
205 abundance in the metaproteome samples (~0.5% of the total sample proteinaceous  
206 biomass, calculated according to<sup>39</sup>), the RuBisCO small and large subunits were among the  
207 unique “*Ca. T. childressi*” proteins detected, further indicating high expression levels. The  
208 abundance of CBB cycle transcripts and proteins highlights their importance in the  
209 metabolism of “*Ca. T. childressi*” (for full transcription and expression information, see Tables  
210 S3 and S4).

211 **Table 1** Transcription and translation ranks for the detectable genes involved in the CBB  
 212 cycle of “*Ca. T. childressi*”.

| <b>Gene_ID</b>      | <b>Name</b>                                                              | <b>Transcription<br/>rank</b> | <b>Translation<br/>rank</b> |
|---------------------|--------------------------------------------------------------------------|-------------------------------|-----------------------------|
| <b>BCM6EPS_1532</b> | Ribulose biphosphate carboxylase large chain<br>EC 4.1.1.39              | 14                            | 18                          |
| <b>BCM6EPS_1531</b> | Ribulose biphosphate carboxylase small chain<br>EC 4.1.1.39              | 17                            | 19                          |
| <b>BCM6EPS_1455</b> | NAD-dependent glyceraldehyde-3-phosphate<br>dehydrogenase<br>EC 1.2.1.12 | 75                            | Not detected                |
| <b>BCM6EPS_1028</b> | Transketolase<br>EC 2.2.1.1                                              | 80                            | Not detected                |
| <b>BCM6EPS_1030</b> | Fructose-biphosphate aldolase class II<br>EC 4.1.2.13                    | 90                            | Not detected                |
| <b>BCM6EPS_1031</b> | Ribulose-phosphate 3-epimerase<br>EC 5.1.3.1                             | 150                           | Not detected                |
| <b>BCM6EPS_1027</b> | Phosphoribulokinase<br>EC 2.7.1.19                                       | 160                           | Not detected                |
| <b>BCM6EPS_1026</b> | Fructose-1-6-biphosphatase- type I<br>EC 3.1.3.11                        | 182                           | Not detected                |
| <b>BCM6EPS_1029</b> | Phosphoglycolate phosphatase<br>EC 3.1.3.18                              | 236                           | Not detected                |
| <b>BCM6EPS_1456</b> | Phosphoglycerate kinase<br>EC 2.7.2.3                                    | 440                           | Not detected                |
| <b>BCM6EPS_514</b>  | Triosephosphate isomerase<br>EC 5.3.1.1                                  | 461                           | Not detected                |

213

214 **Direct stable isotope fingerprinting confirmed a CBB signature for “Ca.**  
215 **Thiobarba childressi”**

216 The stable carbon isotope signatures of an environmental sample reflect the pathway  
217 that dominates inorganic carbon fixation in the chemoautotrophic members of the bacterial  
218 community<sup>40</sup>. Due to differences in kinetic isotope effects, the enzymes involved in the  
219 different carbon fixation pathways vary in the degree to which they discriminate against the  
220 heavier <sup>13</sup>C. This leads to a shift in the <sup>12</sup>C/<sup>13</sup>C ratio between the inorganic carbon source  
221 and the generated biomass that is characteristic for the carbon fixation pathway. The CBB  
222 cycle generates a -13 to -26‰ shift of the δ<sup>13</sup>C ratio, while the rTCA cycle leads to a much  
223 smaller -3 to -13‰ shift<sup>40</sup>.

224 The average δ<sup>13</sup>C value of bulk “B.” *childressi* gill tissues was -47.1 ± 2.6‰, (Table S5).  
225 However, these values reflect the stable isotope composition of all members of the symbiotic  
226 community. As most of the biomass is from the host animal or the highly abundant methane-  
227 oxidizing gammaproteobacterial endosymbiont, the signal of the epibiont is greatly diluted<sup>41</sup>.  
228 To overcome this limitation and to distinguish between the stable carbon isotope values of  
229 the symbiotic partners, we employed the recently-developed direct Protein-SIF method (SIF  
230 = stable isotope fingerprinting) on our metaproteomic data set<sup>33</sup>. Direct Protein-SIF  
231 quantifies the stable isotopic composition of uncultivated members of a mixed community for  
232 which genomes or transcriptomes are available. Peptides from the methane-oxidizing  
233 symbionts had a δ<sup>13</sup>C of -38.8 ± 0.7‰, and host peptides had -44.2 ± 0.6‰. These values  
234 are similar to those of the methane gas at this cold seep site. Thus, the methane-oxidizing  
235 symbionts likely obtain most of their carbon from methane<sup>42,43</sup>. The host values were similar  
236 to those of bulk measurements. However, they were unexpectedly light compared to the  
237 methane-oxidizing symbionts, considering that these mussels are thought to gain most of  
238 their nutrition from their methane-oxidizing symbionts, and would therefore be expected to  
239 have similar δ<sup>13</sup>C values. As *B. childressi* is known to be capable of filter-feeding<sup>44</sup>, these

240 values possibly reflect nutritional supplementation from filter-feeding on microorganisms with  
241 even lighter  $\delta^{13}\text{C}$  values than the methane-oxidizing symbionts, that is from the seep  
242 environment (as phototrophic microorganisms from the surface would have heavier  $\delta^{13}\text{C}$   
243 values).

244 “*Ca. T. childressi*” had a much lower abundance in the metaproteomic dataset compared to  
245 the host and the methane-oxidizing symbionts. Nevertheless, we were able to detect 50  
246 peptides that were unique to “*Ca. T. childressi*”. This allowed us to estimate its natural  $\delta^{13}\text{C}$   
247 value, which was relatively light at  $-66.6 \pm 12.5\text{‰}$ . There are two possible inorganic carbon  
248 sources for these epibionts: 1) ambient seawater inorganic carbon, which has a  $\delta^{13}\text{C}$  value  
249 of  $+3\text{‰}$ <sup>42</sup>, and 2) inorganic carbon produced as an end product of methane oxidation by  
250 methane-oxidizing bacteria or respiration by the host, which we expect to be around  $-39\text{‰}$   
251 for a gas hydrate site, similar to our collection site<sup>41,42</sup>. We calculated the expected values of  
252 biomass generated if either of these carbon sources were fixed through the rTCA cycle or  
253 the CBB cycle (Figure 2). Regardless of the inorganic carbon source, the  $\delta^{13}\text{C}$  values of  
254 “*Ca. T. childressi*” peptides are far lighter than would be expected if they used the rTCA  
255 cycle. They are, however, consistent with the values for carbon fixation that could be  
256 expected when “*Ca. T. childressi*” used the CBB cycle, with inorganic carbon derived from  
257 symbiont methane oxidation or host respiration.

258

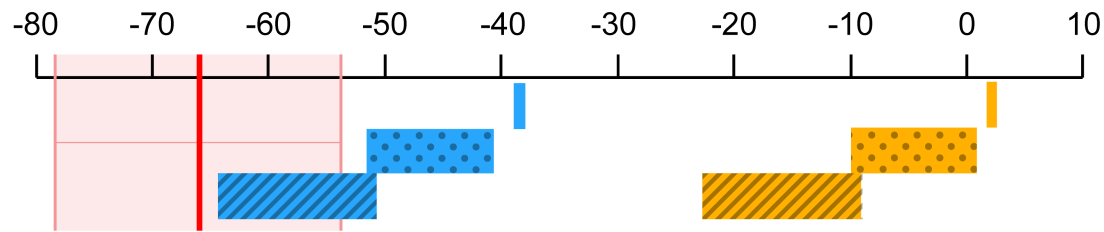

**δ<sup>13</sup>C signatures:**

- Seep methane
- Seep/ambient CO<sub>2</sub>
- MOX derived CO<sub>2</sub> fixed with rTCA cycle
- Seep/ambient CO<sub>2</sub> fixed with rTCA cycle
- MOX derived CO<sub>2</sub> fixed with CBB cycle
- Seep/ambient CO<sub>2</sub> fixed with CBB cycle

“Ca. Thiobarba childressi” peptides      “Ca. Thiobarba childressi” peptides δ<sup>13</sup>C standard error

259

260 **Figure 2.** Stable carbon isotope values of “Ca. Thiobarba childressi” are consistent with  
 261 carbon fixation via the CBB cycle. Model of δ<sup>13</sup>C values of deep-sea carbon and the  
 262 predicted influence of different inorganic fixation pathways on these values. The δ<sup>13</sup>C values  
 263 of CO<sub>2</sub> originating from ambient seawater are shown in yellow, and the expected δ<sup>13</sup>C values  
 264 of CO<sub>2</sub> originating from methane oxidation are shown in blue. The red line represents the  
 265 average δ<sup>13</sup>C value measured for “Ca. Thiobarba” peptides using direct Protein-SIF.  
 266 Reference δ<sup>13</sup>C values for “Seep methane” and “Seep/ambient CO<sub>2</sub>” are based on Macavoy  
 267 et al.<sup>41</sup> and Sassen et al.<sup>42</sup>. Transformations of δ<sup>13</sup>C values for each metabolic pathway are  
 268 estimated based on Pearson et al.<sup>40</sup>.  
 269

270 **Calvin cycle genes in free-living Campylobacterota**

271         After discovering the CBB cycle in the mussel epibionts, we asked if other members  
 272 of the Campylobacterota might also have acquired these genes. We discovered key CBB  
 273 cycle genes in a Campylobacterota draft genome binned from a metagenomic library from  
 274 diffuse hydrothermal fluids collected in the Manus Basin (Western Pacific)<sup>23</sup>. This draft  
 275 genome was composed of 60 contigs with 29.1% GC content, and based on the CheckM  
 276 single-copy genes set, was 92.2% complete<sup>45</sup>. Phylogenomic reconstruction placed this  
 277 organism on a deep branch basal to the Arcobacteraceae family. AAI values showed  
 278 between 55 and 58% similarity with the Arcobacteraceae, thus, this Campylobacterota bin  
 279 might belong to a new genus within the Arcobacteraceae (Supplementary Table 2). Our  
 280 phylogenetic analyses and calculated AAI values clearly show that this environmental bin  
 281 belongs to a Campylobacterota family distinct from “Ca. Thiobarba” (Figure S1). Although a

282 full rTCA cycle was present in the draft genome, we also found genes coding for a RuBisCO  
283 form I enzyme, a hypothetical gene and CbbQ in one cluster. This cluster shared the same  
284 gene order, as well as 84% nucleotide sequence identity, with the CBB cycle cluster we  
285 found in “*Ca. Thiobarba*” (Figure S4). The high sequence similarity between these clusters  
286 suggests a similar origin for both of them. If these genes and the enzymes they encode are  
287 active in the Manus Basin organism, then free-living Campylobacterota may also be able to  
288 use the CBB cycle to fix carbon. These bacteria could be using both cycles depending on  
289 the environmental setting, as suggested for the sulfide-oxidizing gammaproteobacterial  
290 symbionts of vestimentiferan tubeworms<sup>46–48</sup> found at hydrothermal vents, the large sulfur  
291 bacteria *Beggiatoa* and *Thiomargarita* spp.<sup>49–51</sup>, and recently the cultivable sulfur oxidizer  
292 *Thioflavicoccus mobilis*<sup>52</sup>. The tubeworm symbiont *Ca. E. persephone* expresses both the  
293 CBB and the rTCA cycle in the same host individual, but it is still unclear how these two  
294 cycles are coordinated at the level of individual symbiont cells, or over time<sup>47,48</sup>.

295

## 296 **Possible evolutionary origins of Campylobacterota CBB genes**

297

298         Considering the lack of CBB cycle genes in all Campylobacterota investigated prior  
299 to this study, it is most likely that this carbon fixation pathway was acquired by “*Ca.*  
300 *Thiobarba*” and free-living Campylobacterota through horizontal gene transfer, rather than  
301 being an ancestral pathway in this phylum. We investigated the evolutionary origins of the  
302 genes coding for CBB enzymes, including those with additional roles in other metabolic  
303 pathways, using BLAST analyses of nucleotide and protein sequences, and phylogenetic  
304 reconstruction of protein sequences. BLAST analyses revealed that only two of the “*Ca.*  
305 *Thiobarba*” CBB genes were affiliated with genes from other Campylobacterota. Of the other  
306 10, five had best hits to Gammaproteobacteria, and five had best hits to Betaproteobacteria  
307 (Table S6).

308 Phylogenetic reconstruction further supported our hypothesis that the  
309 “*Ca. Thiobarba*” CBB cycle is a ‘patchwork’ of genes with evolutionary origins in the  
310 Betaproteobacteria, Gammaproteobacteria, and Campylobacterota (Figure 3). The RuBisCO  
311 large and small subunits *rbcL* and *rbcS*, their accessory proteins *cbbQ* and *cbbO*, as well as  
312 the glyceraldehyde-3-phosphate dehydrogenase proteins clustered with a clade of  
313 gammaproteobacterial sulfur-oxidizing chemolithoautotrophs. Many of the related sequences  
314 belonged to free-living sulfur oxidizers such as “*Ca. Thioglobus autotrophicus*” and the  
315 gammaproteobacterial sulfur-oxidizing endosymbionts of bathymodiolin mussels (Figure 4).  
316 Phylogenetic analysis of “*Ca. Thiobarba*” PRK proteins placed these on a long branch  
317 between gamma-, alpha- and betaproteobacterial clades, but this placement did not have  
318 high support (Figure 5). This could indicate that the “*Ca. Thiobarba*” PRK proteins truly  
319 belong to a Campylobacterota gene family, and because these are the first sequences  
320 available from this family, their phylogenetic placement is currently not well supported.  
321 Further sampling may help to clarify their evolutionary history. Four “*Ca. Thiobarba*” CBB  
322 cycle proteins consistently belonged to a sister branch to betaproteobacterial sequences  
323 (fructose 1,6-bisphosphatase, 1,6-bisphosphate aldolase, transketolase and ribulose  
324 phosphate 3-epimerase). Only two proteins were phylogenetically related to those from other  
325 Campylobacterota (phosphoglycerate kinase and triose phosphate isomerase) (Figures S5  
326 to S24).

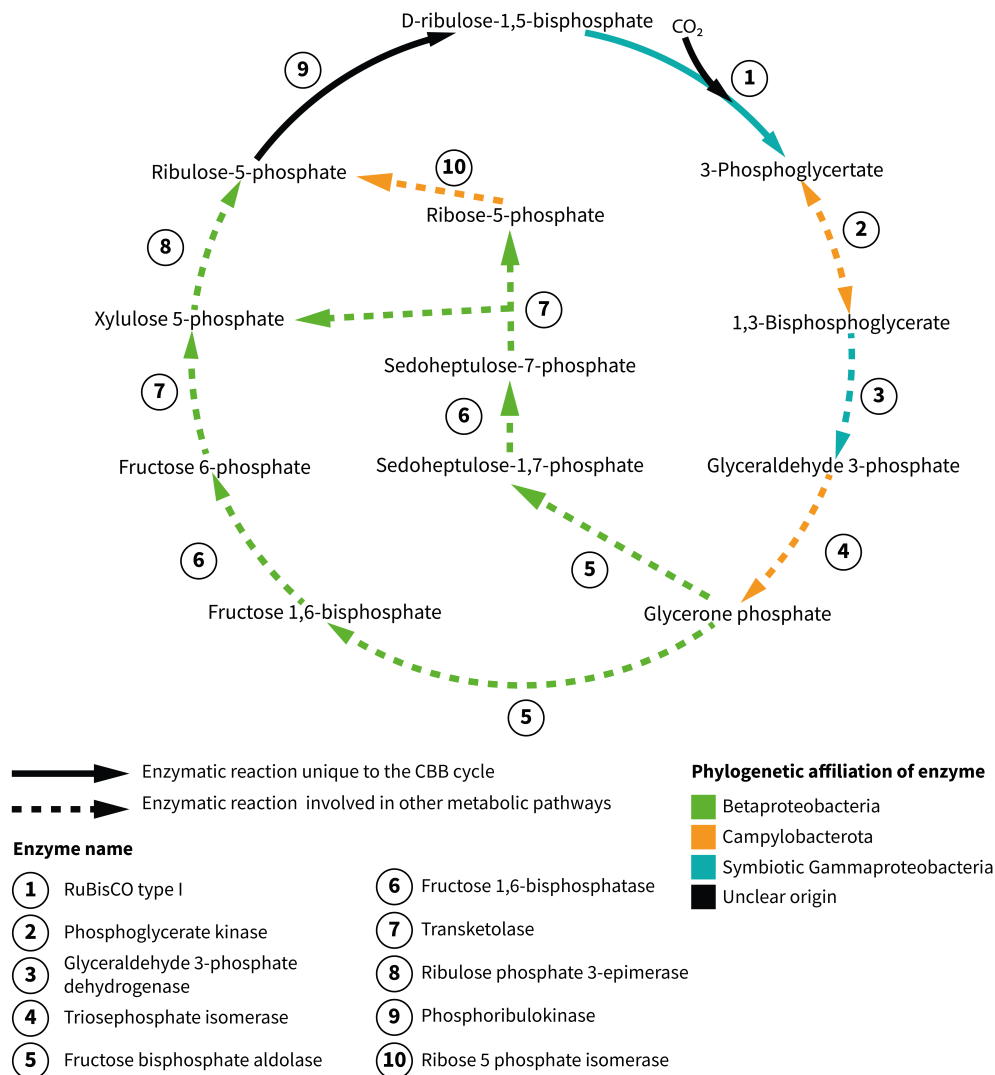

327

328 **Figure 3. “Ca. Thiobarba” genomes encode a CBB cycle with genes affiliated to at**  
 329 **least three phylogenetically distinct classes.** The solid arrows indicate enzymatic  
 330 reactions that are unique to the CBB cycle, while the dashed arrows indicate that the  
 331 enzymes are also involved in other metabolic pathways. Enzyme names are shown in bold  
 332 and the colors represent their phylogenetic affiliations.  
 333



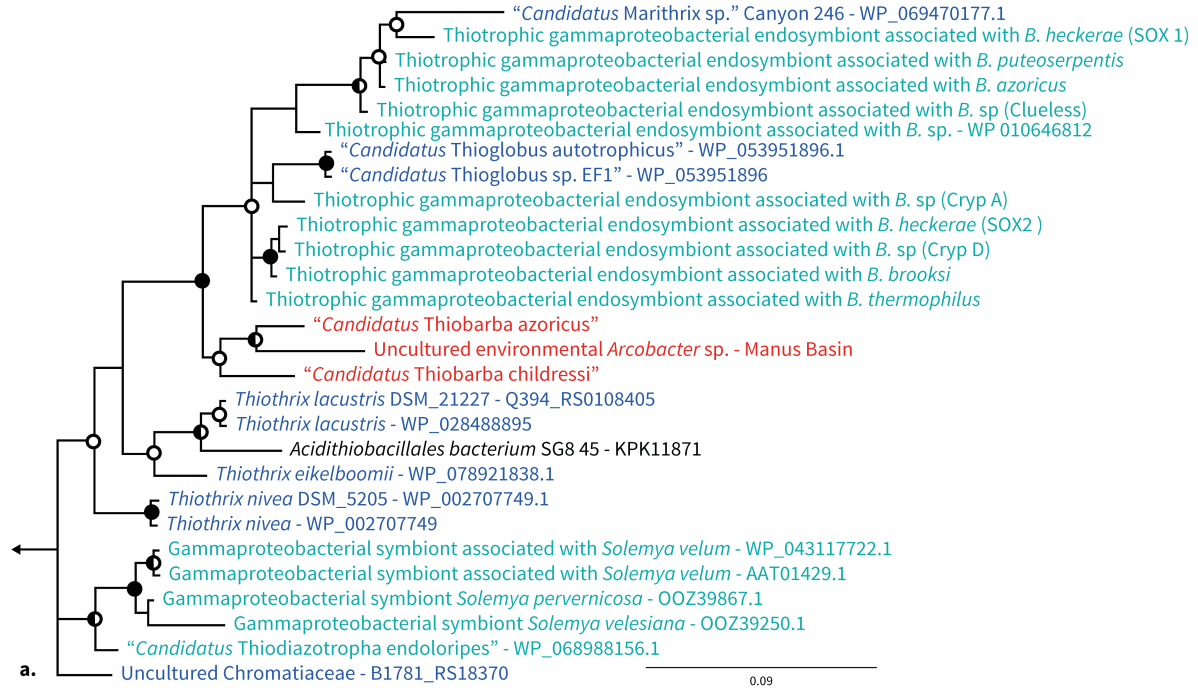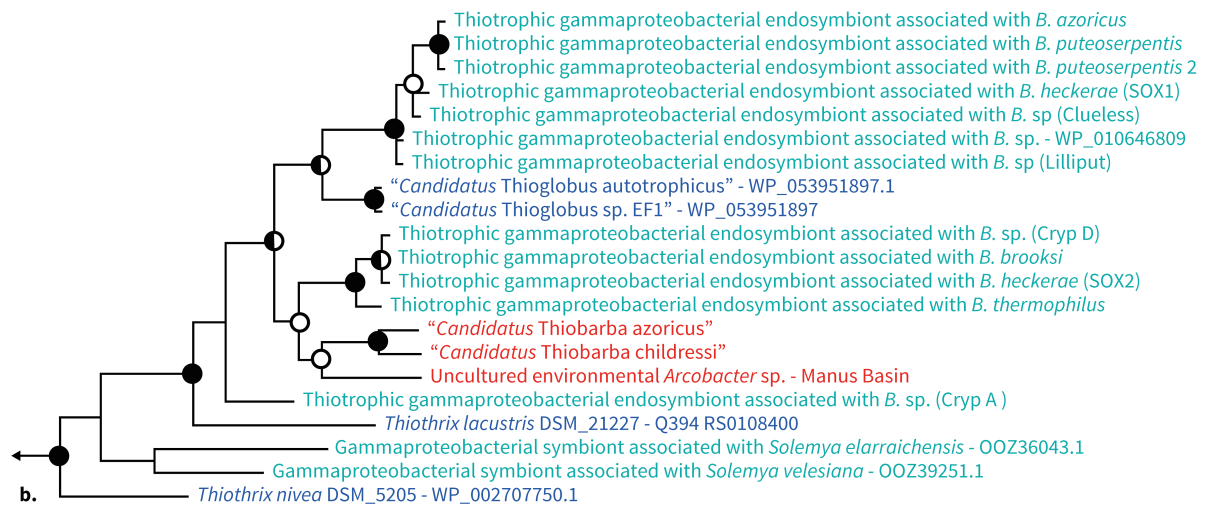

Posterior  
Probability

○ > 0,7  
◐ > 0,9  
● 1

Sequences described in this study

Free-living Gammaproteobacteria

Symbiotic Gammaproteobacteria

Others

335 **Figure 4. “Ca. Thiobarba” RuBisCO proteins cluster with gammaproteobacterial**  
 336 **sequences.** Bayesian inference trees of RuBisCO large (a) and small (b) subunit amino acid  
 337 sequences under an LG model with Gamma-distributed rates of evolution. Analyses were  
 338 performed with 6 million generations using two parallel Monte Carlo Markov chains. Sample  
 339 trees were taken every 25000 generations. Left arrows indicate truncated tree, tree roots  
 340 were built from *Prochlorococcus* and *Synechococcus* sequences for (a) and *Planktothrix* and  
 341 *Synechococcus* sequences for (b). Full trees are displayed as Supplementary figures 14 and  
 342 15.  
 343  
 344

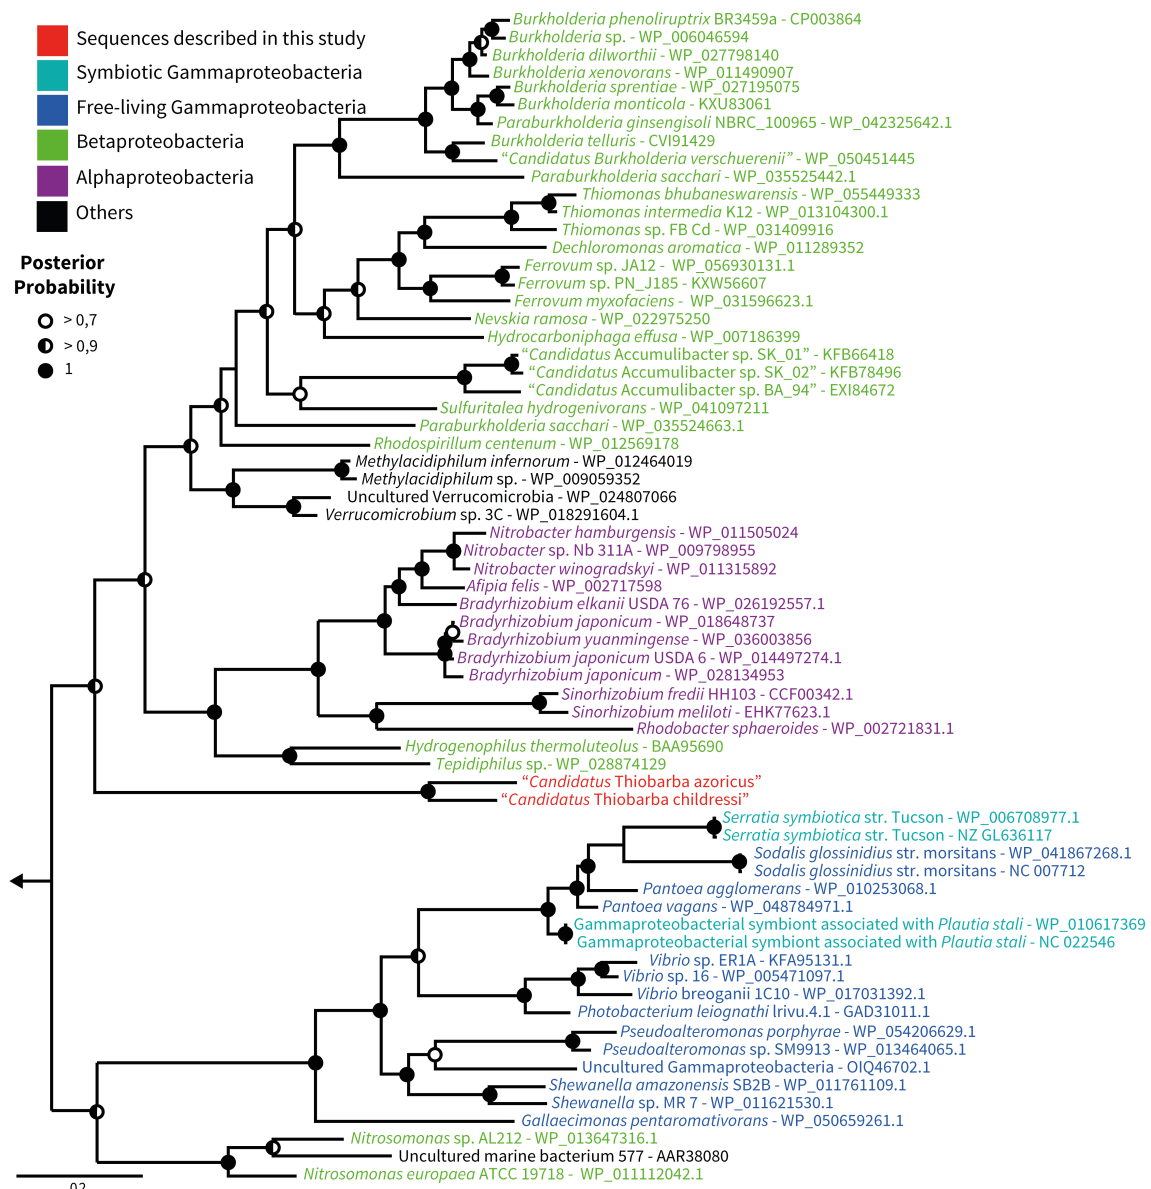

345

346 **Figure 5. “Ca. Thiobarba” phosphoribulokinases are loosely affiliated with those from**  
347 **Betaproteobacteria, Alphaproteobacteria, and Verrucomicrobia.** Bayesian inference tree  
348 of phosphoribulokinase amino acid sequences under an LG model with Gamma-distributed  
349 rates of evolution and a proportion of invariant sites. Analyses were performed with 6 million  
350 generations using two parallel Monte Carlo Markov chains. Sample trees were taken every  
351 25000 generations. Left arrow indicates truncated root, the root is built from distant  
352 *Prochlorococcus* and *Synechococcus* sequences. Full tree is displayed as supplementary  
353 figure 23.

354

355 The CBB genes consistently fell into three phylogenetic groups: some CBB genes  
356 were most closely related to those of other Campylobacterota, some to those of  
357 Gammaproteobacteria, and some to those of Betaproteobacteria. The “Ca. Thiobarba” CBB  
358 genes that fell within the Gammaproteobacteria were similarly organized to genes with which  
359 they were most closely related, such as those from “Ca. Thioglobus autotrophicus” and the  
360 endosymbionts of bathymodiolin mussels (Figure S24 and Supplementary note 4). Similarly,  
361 the genes that were most closely related to Betaproteobacteria had a similar organization to  
362 genes found in free-living Betaproteobacteria such as *Paraburkholderia xenovorans*  
363 (NC\_007651) and *Dechloromonas aromatica* (NC\_007298) (Figure S24). This similarity  
364 further supports the hypothesis that these CBB cycle genes were acquired by “Ca.  
365 Thiobarba” at least twice, in independent horizontal gene transfer (HGT) events, with one  
366 possibly originating from Gammaproteobacteria, and another possibly from  
367 Betaproteobacteria. Alternatively, it is also possible that the Betaproteobacteria-like genes  
368 clustering on long branches, such as the PRK, are Campylobacterota genes that have not  
369 previously been sequenced. Regardless of the number of HGT events, the acquisition of  
370 these genes presumably happened in a common ancestor to the “Ca. Thiobarbaceae”.  
371 Codon usage analysis supports our hypothesis of a relatively ancient acquisition, as the  
372 codon usage of the CBB genes was similar to that of the “Ca. Thiobarbaceae” core genome  
373 (Figure S25). After horizontal acquisition, the codon usage initially reflects the original  
374 donor’s, but over time mutates to match its host’s<sup>53</sup>.

375 Gene order within each of the two CBB clusters was identical in “*Ca. T. azoricus*” and  
376 “*Ca. T. childressi*”. This further supports our hypothesis of a single acquisition event for each  
377 cluster in a common ancient ancestor. This synteny also highlights the tendency of these  
378 clusters to resist genomic rearrangements. In contrast, the genomic neighborhoods of the  
379 CBB clusters differed between the two “*Ca. Thiobarba*”, indicating that subsequent genome  
380 rearrangements occurred since the divergence of these two epibionts. Mobile element genes  
381 and transposases were the most highly expressed genes in “*Ca. T. childressi*” based on our  
382 transcriptomes, which, if active, could explain these rearrangements (Table S3)<sup>54</sup>.

383

### 384 **Evolutionary advantages of the CBB cycle**

385 Members of the Campylobacterota occupy remarkably diverse habitats, and have a  
386 range of different lifestyles and metabolic capabilities, from chemolithoautotrophs that use a  
387 suite of electron donors and acceptors, to heterotrophic symbionts and pathogens of  
388 humans and other animals<sup>13,55</sup>. Evolutionary studies suggest that Campylobacterota  
389 emerged in deep-sea habitats, subsequently colonizing and diversifying across terrestrial  
390 and human-associated environments<sup>13,56</sup>. Considering the distribution of chemosynthetic  
391 potential within the Campylobacterota, it has been hypothesized that they evolved from an  
392 autotrophic common ancestor that first used the Wood–Ljungdahl pathway before switching  
393 to a more flexible rTCA cycle<sup>13,17,57</sup>. We hypothesize that in the symbiotic “*Ca. Thiobarba*”  
394 lineage, the rTCA cycle was replaced by yet another carbon fixation pathway, the CBB cycle.  
395 Several environmental and genomic factors provide important clues as to why the CBB cycle  
396 was selected over the rTCA cycle in “*Ca. Thiobarba*”. Both the CBB and rTCA cycles serve  
397 the same purpose, the fixation of inorganic carbon to provide building blocks for cell  
398 biomass. But a major difference between the two known carbon fixation pathways is their  
399 energy requirements. For example, if one molecule of pyruvate is synthesized from CO<sub>2</sub> via  
400 the CBB cycle seven molecules of ATP are used, while the rTCA cycle only requires two

401 ATP<sup>2</sup>. From an evolutionary point of view, exchanging a more energy-efficient carbon fixation  
402 pathway with a costlier one could best be explained if it comes with an additional advantage  
403 such as oxygen tolerance. The rTCA cycle relies on ferredoxin-based enzymes, which are  
404 quickly oxidized by oxygen, and as a result, most organisms with an rTCA cycle are  
405 anaerobes or microaerobes<sup>58,59</sup>. In contrast, CBB cycle enzymes are less affected by  
406 oxygen<sup>60</sup>. “*Ca. Thiobarba*” species colonize the gills of bathymodiolin mussels, a gas  
407 exchange organ that is exposed to oxygen and is typically dominated by  
408 gammaproteobacterial endosymbionts. The close phylogenetic relationship between some  
409 “*Ca. Thiobarba*” CBB genes with those from the sulfur-oxidizing gammaproteobacterial  
410 endosymbionts of bathymodiolin mussels suggests that either i) both symbionts acquired  
411 CBB genes from the same source or ii) “*Ca. Thiobarba*” acquired key genes from the  
412 gammaproteobacterial endosymbionts already adapted to the mussel gill niche.

413 Many deep-sea Campylobacterota grow attached to surfaces<sup>29,61,62</sup>, thus, a  
414 “*Ca. Thiobarba*” ancestor might have colonized mussel gills prior to acquiring the CBB  
415 cycle. Living attached to the gills would bring these epibionts into close proximity to the  
416 gammaproteobacterial endosymbionts. Sharing a niche has been shown to be a stronger  
417 predictor of horizontal gene transfer than phylogenetic relatedness<sup>63</sup>. Moreover,  
418 Campylobacterota have remarkably flexible genomes, with rampant genomic rearrangement  
419 and DNA uptake<sup>64–66</sup>. This affinity for foreign DNA uptake, and the physical proximity of  
420 epibionts and endosymbionts support scenario ii) above. The acquisition of the CBB carbon  
421 fixation pathway may have enabled “*Ca. Thiobarba*” to thrive attached to an animal host,  
422 leading to the complete reliance on the CBB cycle for carbon fixation and the gradual loss of  
423 the rTCA cycle.

424 Another major difference between the CBB and rTCA cycles is the metabolic end  
425 product: Sugar precursors such as glyceraldehyde 3-phosphate for the CBB cycle, and  
426 acetyl-CoA for the rTCA cycle<sup>2,60</sup>. Intriguingly, the “*Ca. Thiobarba*” genomes encoded many

427 pathways requiring sugars, including N-linked glycosylation, capsular polysaccharides and  
428 lipooligosaccharide synthesis, some of which are not found in related chemolithoautotrophic  
429 Campylobacterota, but are present in heterotrophic host-associated Campylobacterota. “Ca.  
430 Thiobarba’s” ability to gain sugar precursors while fixing CO<sub>2</sub> using the CBB cycle might be  
431 advantageous, despite the higher energy requirements compared to the rTCA cycle. Many of  
432 the pathways requiring sugars are predicted to play a role in surface structures and  
433 extracellular polysaccharide capsule formation, which can be key mediators of host  
434 attachment, and thus may be essential for its epibiotic lifestyle<sup>67,68</sup>.

435

### 436 **Evolving a Calvin cycle in nature and the laboratory**

437 The complex metabolic network that links carbon fixation and central carbon  
438 metabolism poses a massive challenge to switching carbon fixation pathways, either in  
439 nature or in the laboratory. These links are usually specific to each pathway and to each  
440 organism<sup>60</sup>. Efforts to introduce non-native carbon fixation pathways have mainly focused on  
441 the CBB cycle because theoretically, only two additional enzymes are needed to run this  
442 cycle, even in heterotrophs such as *E. coli*<sup>69,70</sup>. However, a number of challenges must be  
443 overcome to express ‘foreign’ carbon fixation pathways in new organisms. In addition to the  
444 challenges inherent in expressing horizontally acquired genes, such as non-native promoter  
445 and codon usage, and the need for chaperones and biosynthesis enzymes, gene expression  
446 must be tightly regulated to balance the production and consumption of intermediates and  
447 end products. Because of this, to run the CBB cycle in engineered *E. coli*, the CBB cycle had  
448 to be synthetically decoupled from gluconeogenesis by deleting the phosphoglycerate  
449 mutase gene<sup>69</sup>. Switching from one carbon fixation pathway to another may be simpler in  
450 chemolithoautotrophs than re-wiring a chemoorganoheterotroph such as *E. coli* to use the  
451 CBB cycle. In a chemolithoautotroph, production of energy and reducing equivalents are  
452 already decoupled from carbon fixation, as they are generated through oxidation of reduced

453 compounds such as sulfur. Nevertheless, switching from the rTCA to the CBB cycle is a  
454 major shift in cellular metabolism, requiring adaptation of diverse biosynthetic pathways  
455 linked to carbon fixation. As far as we are aware, this has not yet been observed in nature,  
456 but in the laboratory, *E. coli* required extensive fine-tuning of metabolic enzymes beyond the  
457 CBB cycle through experimental evolution to run a fully functional CBB cycle<sup>3,69</sup>.

458

## 459 **Conclusions**

460 The environment is a potent driving force in structuring symbiotic and free-living microbial  
461 communities<sup>27,30,71</sup>. The distribution of gammaproteobacterial and campylobacterotal sulfur  
462 oxidizers is a typical example of adaptation to a geochemical niche; in a range of  
463 environments from hydrothermal vents<sup>23</sup> and cold seeps<sup>21</sup> to oxygen minimum zones<sup>72</sup> and  
464 coastal sediments<sup>73</sup>, Gammaproteobacteria are usually associated with low-sulfide, high-  
465 oxygen environments, and campylobacterota with high-sulfide, low-oxygen environments.  
466 The horizontal acquisition of the CBB cycle genes may have allowed campylobacterotal  
467 “*Ca. Thiobarba*” to establish a symbiotic relationship in a niche that is usually dominated by  
468 Gammaproteobacteria.

469 The diverse origins of “*Ca. Thiobarba*’s” CBB cycle genes showcases the modularity<sup>74</sup> of  
470 bacterial metabolism and demonstrates that in principle, fully functional metabolic cycles can  
471 be pieced together with enzymes from different organisms, both in the laboratory<sup>3</sup> and in  
472 nature. In addition to acquiring the two genes theoretically required by a heterotroph to  
473 encode a full CBB cycle, “*Ca. Thiobarba*” seems to have replaced an extensive set of  
474 additional CBB genes. This suggests that similar to laboratory models, this natural metabolic  
475 switch required ‘tweaking’ of further enzymes of this pathway, and possibly other pathways  
476 that siphon off intermediates. Metabolic modularity is considered one of the main factors  
477 organizing biological networks<sup>74</sup>. Understanding genome evolution in “*Ca. Thiobarba*” will  
478 shed light on the complex interplay between gene acquisition, expression and the selection



479 that caused the evolution of this major metabolic shift. Our findings highlight the central role  
480 that horizontal gene transfer plays in metabolic modularity and environmental adaptation.

481           Carbon isotope signatures are routinely used to assess the relative importance of the  
482 CBB and rTCA cycles in contemporary and past natural environments, and to infer the key  
483 organisms responsible for primary production<sup>75–78</sup>. Although stable isotope signatures may  
484 accurately reflect the relative importance of distinct carbon fixation pathways in  
485 environmental samples, our study shows that assigning these key ecological functions to  
486 particular microbial groups requires a deeper understanding of how the underlying metabolic  
487 pathways are distributed in nature.



## 488 **Material & Methods**

### 489 **Sample collection**

490 “*B.*” *childressi* individuals were collected at cold seeps in the northern Gulf of Mexico  
491 at the GC246 and GC234 sites during the R/V Atlantis AT26-13 cruise in April 2014, Nautilus  
492 cruise NA044 in July 2014 and Nautilus NA058 cruise in May 2015. The *B. azoricus*  
493 individual was collected at the Lucky Strike hydrothermal vent field on the North Mid-Atlantic  
494 Ridge (NMAR) during the Biobaz cruise in 2013. A list of samples and fixation details are  
495 summarized in Table S7.

### 496 **DNA and RNA extraction**

497 DNA was extracted from mussel gill tissue according to Zhou *et al.* (1996)<sup>79</sup> with the  
498 following modifications: An initial overnight incubation step was performed at 37 °C in 360 µl  
499 of extraction buffer (100 mM Tris-HCl [pH 8.0], 100 mM sodium EDTA [pH 8.0], 100 mM  
500 sodium phosphate [pH 8.0], 1.5 M NaCl, 1% CTAB) and 40 µl of proteinase K (10 mg/ml).  
501 For transcriptome sequencing, RNA was extracted with an Allprep(R) DNA/RNA micro kit  
502 (Qiagen, Hilden, Germany) according to the manufacturer’s instructions. Concentrations of  
503 DNA and RNA were measured with a Qubit® 2.0 Fluorometer (Invitrogen, Eugen, USA).

### 504 **Metagenome sequencing and assembly**

505 DNA extracted from gill tissues of one “*B.*” *childressi* individual was sequenced at the  
506 Center for Biotechnology at the University of Bielefeld (Bielefeld, Germany). A total of  
507 471,459,598 paired-end reads (150 bp) and 7,739,150 paired-end reads (250 bp long) were  
508 generated on Illumina HiSeq 1500 and MiSeq machines, respectively. DNA extracted from  
509 gill tissues of one “*B.*” *childressi* and one *B. azoricus* individual was sequenced by the Max  
510 Planck Genome Center (Cologne, Germany) and generated respectively 57,172,785 and  
511 159,408,731 paired-end reads (150 bp long) on an Illumina HiSeq 2500.

512 We screened the metagenomic and metatranscriptomic libraries for the presence of  
513 campylobacterota 16S rRNA sequences. The PhyloFlash 2.0 suite  
514 (<https://github.com/HRGV/phyloFlash>) was used to perform RNA small subunit (SSU)  
515 screening and reconstructions.

516 Metagenome assembly was performed as follows: First the raw reads were quality  
517 trimmed (Q=2) and Illumina adapters were removed using BBduk (BBmap suite v37.9 from  
518 Bushnell B. - [sourceforge.net/projects/bbmap/](https://sourceforge.net/projects/bbmap/)). An initial assembly was performed with  
519 Megahit<sup>80</sup> using default settings. The resulting assembly file was then analyzed with  
520 metawatt V2.0 binning tools<sup>81</sup>, and draft genome bins were generated by analyzing contig  
521 tetranucleotide frequency, differential coverage and GC content. Contigs belonging to bins  
522 with an Campylobacterota taxonomic signature were extracted. The quality-trimmed  
523 metagenomic reads were then mapped against the Campylobacterota contigs using Bbmap  
524 (BBmap suite v37.9), filtering reads with a minimum identity of 98%. The mapped reads  
525 were then used for a new assembly using SPAdes 3.4.2<sup>82</sup> with default settings. Additional  
526 details on the assembly process of “*Ca. T. azoricus*” are described in Supplementary note 3.  
527 The bin of the free-living Campylobacterota carrying CBB cycle genes was obtained from the  
528 Manus Basin metagenome “NSu-F5” as described in<sup>23</sup> with three rounds of read-mapping,  
529 re-assembly and binning for final bin completion of 92% and 11.7% contamination.

530 Bin quality was checked with CheckM<sup>45</sup> and a new iteration of taxonomic binning,  
531 mapping and assembly was performed until no contamination from other bacterial strains or  
532 host remained in the assembly. Contigs smaller than 900 bp were included in BLAST  
533 analysis but excluded from subsequent analyses because they were unlikely to have any  
534 relevant genetic information. Genomes were annotated with RAST and cross-checked with  
535 IMG ER web servers<sup>83-85</sup>. Genome average nucleotide identity (ANI) and average amino  
536 acid identity (AAI) were calculated using the AAI and ANI calculator from the enveomics  
537 collection<sup>86</sup> with the default settings. The specific coverage for genomes and gene was  
538 calculated using BBmap.

539 Raw data was uploaded to the European Nucleotide Archive under the accession  
540 numbers: PRJEB19882, PRJEB23284, and PRJEB23286.

## 541 **Transcriptome sequencing and processing**

542 Transcriptomes of three “*B. childressi*” individuals were sequenced at the Max Planck  
543 Genome Center (Cologne, Germany) details are in Table S7. Transcriptome reads were  
544 processed as in Rubin-Blum et al.<sup>87</sup>. Briefly, raw reads were mapped against the “*Ca. T.*  
545 *childressi*” draft genome with BBmap (BBmap suite v.37.09): reads were quality trimmed  
546 (Q=2), Illumina adapters removed and a minimum similarity of 98% used to map to the  
547 reference genome. The number of transcriptome reads mapping to each gene was  
548 estimated with featureCounts v1.5.2<sup>88</sup>. To compare the transcriptome libraries of each  
549 individual, a normalization factor was estimated with calcNormFactors based on the trimmed  
550 mean of M-values (TMM) implemented in the edgeR version 3.16.5<sup>89</sup>. The TMM normalized  
551 read counts were converted to reads per kilobases of exon per million reads mapped  
552 (RPKM) with edgeR (<http://www.bioconductor.org>).

## 553 **rTCA cycle gene screening**

554 To confirm presence or absence of the rTCA cycle in the metagenomic and  
555 transcriptomic libraries, we created a BLAST database containing published amino acid  
556 sequences of Campylobacterota rTCA key genes, citrate lyase, 2-oxoglutarate ferredoxin  
557 oxidoreductase and pyruvate ferredoxin kinase. The first metagenomic assembly iterations,  
558 as well as the final Campylobacterota bins, were screened using BLASTX against the  
559 respective database to detect the presence of potential rTCA cycle genes.

## 560 **Phylogenomic reconstruction**

561 Phylogenomic trees were calculated using Phylogenomics-tools (Brandon Seah,  
562 <https://github.com/kbseah/phylogenomics-tools>). The draft genomes “*Ca. T. childressi*” and  
563 “*Ca. T. azoricus*” and the free-living Campylobacterotum from Manus basin were compared

564 to the genomes of 41 Campylobacterota representatives. Five Deltaproteobacteria genomes  
565 were used as outgroup. Universal marker proteins conserved across all bacteria were  
566 screened using Amphora2<sup>90</sup>. Genes present in one copy in every draft genome were  
567 selected for the phylogenomic reconstruction (*rpsI* , *rplT* , *rpsB* , *rplM* , *rpsS* , *rplK* , *rplL* , *frr* ,  
568 *rplP* , *rplA* , *rplB* , *pyrG* , *rpsM* , *smpB*). Each gene set was aligned using MUSCLE<sup>91</sup>. The  
569 concat\_align.pl script (phylogenomics-tools) was used for determining the best protein  
570 substitution model of each marker alignment (*rpsI* ::LG , *rplT* ::LG , *rpsB*::LG , *rplM*::LG ,  
571 *rpsS*::LG , *rplK*::RTREV , *rplL*::LG , *frr* ::LG , *rplP* ::LG , *rplA*::LG , *rplB*::LG , *pyrG*::LG  
572 , *rpsM*::LG , *smpB*::LG). To calculate the multi-gene phylogeny, the marker genes from each  
573 genome were concatenated. The best tree with SH-like aLRT support value was calculated  
574 with RAxML<sup>92</sup> using the tree\_calculations.pl script (phylogenomics-tools).

## 575 **Phylogenetic analysis**

576 The IMG ER pipeline detected genes with a gammaproteobacterial signature based  
577 on homologies to sequences in its database. We extracted and analyzed these sequences  
578 with the Geneious software version v 9.1.8<sup>93</sup> (<http://www.geneious.com>). Genes predicted by  
579 automated annotations were manually verified and curated using the public databases NCBI,  
580 Uniprot and Swissprot. Sequences of interest were compared to the NCBI nucleotide and  
581 amino acid databases using nucleotide- and amino acid-BLAST. We retrieved closely-related  
582 sequences from the BLASTX results on the NCBI non-redundant database. Additionally,  
583 other reference sequences were included in the analysis and all sequences were aligned  
584 using MUSCLE (v3.6.)<sup>91</sup>. To detect the best substitution model to use for phylogenetic  
585 reconstruction, we used the ProtTest3 package<sup>94</sup> (Model summarized in Supplementary  
586 Table 8). Phylogenetic analyses were then performed using Bayesian and Maximum  
587 likelihood analyses. Bayesian analysis was performed with MrBayes (v3.2)<sup>95</sup> under a  
588 General Time Reversible model with the best-fitted substitution model. Analyses were  
589 performed for two million generations using four parallel Monte Carlo Markov chains. Sample

590 trees were taken every 1000 generations. Maximum likelihood trees were calculated with  
591 PHYML<sup>96</sup> using the best-fitted substitution model. We used 1000 bootstraps as support  
592 values for nodes in the trees.

### 593 **Codon usage analysis**

594 The codon usage of “*Ca. T. azoricus*” and “*Ca. T. childressi*” genes was determined  
595 with CodonW<sup>53</sup> using default parameters. The Principal Component Analysis was plotted  
596 with R (version 3.4.0).

### 597 **Bulk isotope analysis**

598 Parts of “*B.*” *childressi* gill tissues were used for bulk stable isotope analysis. Tissue pieces  
599 were oven-dried overnight and ground to a fine powder. The dried tissue was weighed and  
600 samples (0.3-0.7 mg dry weight) were packaged in tin capsules for mass spectrometry, and  
601 analyzed using a Costech (Valencia, CA USA) elemental analyzer interfaced with a  
602 continuous flow Micromass (Manchester, UK) Isoprime isotope ratio mass spectrometer (EA-  
603 IRMS) for <sup>15</sup>N/<sup>14</sup>N and <sup>13</sup>C/<sup>12</sup>C ratios. Measurements are reported in  $\delta$  notation [per mil (‰)  
604 units] and ovalbumin was used as a routine standard. Precision for  $\delta^{13}\text{C}$  and  $\delta^{15}\text{N}$  was  $\pm$   
605 0.2 ‰ and  $\pm$  0.4 ‰.

### 606 **Protein extraction and peptide preparation**

607 Parts of the gills (see Supplementary Table 7) of three “*B.*” *childressi* specimen were used to  
608 prepare tryptic digests following the filter-aided sample preparation (FASP) protocol of  
609 Wisniewski et al.<sup>97</sup> with minor modifications<sup>55</sup>. Prior to FASP, cells were disrupted by beat-  
610 beating samples in SDT lysis buffer (4% (w/v) SDS, 100 mM Tris-HCl pH 7.6, 0.1 M DTT)  
611 using lysing matrix D tubes (MP Biomedicals) before heating to 95 °C for 10 minutes.

612 To allow binding of peptides to the SCX column for 2D-LC methods, peptides were desalted  
613 using Sep-Pak C18 Plus Light Cartridges (Waters) according to the manufacturer’s  
614 instructions. A centrifugal vacuum concentrator was used to exchange acetonitrile after

615 peptide elution with 0.2% (v/v) formic acid. The Pierce Micro BCA assay (Thermo Scientific)  
616 was used to determine peptide concentrations, following the manufacturer's instructions.

## 617 **1D and 2D LC-MS/MS**

618 All three samples were analyzed by 1D-LC-MS/MS and 2D-LC-MS/MS as described in  
619 Kleiner et al.<sup>39</sup>. Briefly, sample analysis via 1D-LC-MS/MS was run twice. An UltiMate™ 3000  
620 RSLCnano Liquid Chromatograph (Thermo Fisher Scientific) was used to load 1.5-3 µg  
621 peptide with loading solvent A (2% acetonitrile, 0.05% trifluoroacetic acid) onto a 5 mm, 300  
622 µm ID C18 Acclaim® PepMap100 pre-column (Thermo Fisher Scientific). Peptides were  
623 eluted from the pre-column onto a 50 cm x 75 µm analytical EASY-Spray column packed  
624 with PepMap RSLC C18, 2 µm material (Thermo Fisher Scientific) heated to 45 °C. An Easy-  
625 Spray source connected the analytical column to a Q Exactive Plus hybrid quadrupole-  
626 Orbitrap mass spectrometer (Thermo Fisher Scientific). Separation of peptides on the  
627 analytical column was achieved at a flow rate of 225 nl min<sup>-1</sup> using a 460 min gradient going  
628 from 98% buffer A (0.1% formic acid) to 31% buffer B (0.1% formic acid, 80% acetonitrile) in  
629 363 min, then to 50% B in 70 min, to 99% B in 1 min and ending with 99% B. Electrospray  
630 ionization (ESI) was used to ionize eluting peptides. Carryover was reduced by two wash  
631 runs (injection of 20 µl acetonitrile, 99% eluent B) and one blank run between samples. Data  
632 acquisition with the Q Exactive Plus was done as in <sup>98</sup>.

633 The 2D-LC-MS/MS experiments were performed as described by Kleiner et al.<sup>39</sup> with the  
634 modification that pH plugs instead of NaCl salt plugs were used for peptide elution from the  
635 SCX column. Briefly, 4.5 µg of peptide were loaded with loading solvent B (2% acetonitrile,  
636 0.5% formic acid) onto a 10 cm, 300 µm ID Poros 10 S SCX column (Thermo Fisher  
637 Scientific) at a flow rate of 5 µl min<sup>-1</sup> using the same LC as for 1D-LC-MS/MS. Peptides that  
638 did not bind to the SCX column were captured by the C18 pre-column (same as for 1D-LC),  
639 which was in-line downstream of the SCX column. The C18 pre-column was then switched  
640 in-line with the 50 cm x 75 µm analytical column (same as for 1D) and the breakthrough

641 separated using a gradient of eluent A and B (2% B to 31% B in 82 min, 50% B in 10 min,  
642 99% B in 1 min, holding 99% B for 7 min, back to 2% B in 1 min, holding 2% B for 19 min).  
643 Peptides were eluted step-wise from the SCX to the C18 pre-column by injecting 20  $\mu$ l of pH  
644 buffers with increasing pH (pH 2.5-pH 8, CTIBiphase buffers, Column Technology Inc.) from  
645 the autosampler. After each pH plug, the C18 pre-column was again switched in-line with the  
646 analytical column and peptides separated as above. Between samples, the SCX column was  
647 washed twice (injection of 20  $\mu$ l 4 M NaCl in loading solvent B, 100% eluent B), the RP  
648 column once (injection of 20  $\mu$ l acetonitrile, 99% eluent B) and a blank run was done to  
649 reduce carryover. Data was acquired with the Q Exactive Plus as in <sup>98</sup>.

## 650 **Protein identification and quantification**

651 A database containing protein sequences predicted from the metatranscriptomic and -  
652 genomic data of the "*B.*" *childressi* symbiosis generated in this study was used for protein  
653 identification as described in the 'Metagenome assembly' section above. The cRAP protein  
654 sequence database (<http://www.thegpm.org/crap/>), which contains sequences of common  
655 lab contaminants, was appended to the database. The final database contained 38,418  
656 protein sequences. For protein identification, MS/MS spectra were searched against this  
657 database using the Sequest HT node in Proteome Discoverer version 2.0.0.802 (Thermo  
658 Fisher Scientific) as in<sup>33</sup>.

659 To quantify proteins, normalized spectral abundance factors (NSAFs)<sup>99</sup> were calculated per  
660 species and multiplied by 100, to give the relative protein abundance in %. For biomass  
661 calculations, the method described by Kleiner et al.<sup>39</sup> was used. Calculations of NSAFs and  
662 biomass for each sample were based on the combined data from both 1D-LC-MS/MS runs  
663 and the one 2D-LC-MS/MS run.

664

## 665 **Direct Protein-SIF**

666 Stable carbon isotope fingerprints (SIFs) for “*B.*” *childressi* and its symbionts were  
667 determined as described by Kleiner et al.<sup>33</sup>. Human hair with a known  $\delta^{13}\text{C}$  value was used  
668 as a reference to correct for instrument fractionation. A tryptic digest of the reference  
669 material was prepared as described above and with the same 1D-LC-MS/MS method as the  
670 samples. Due to the low abundance of the “*Ca. Thiobarba*” symbiont in terms of biomass the  
671 six 1D-LC-MS/MS datasets (technical replicate runs of three gill samples) were combined in  
672 one peptide identification search to obtain enough peptides for SIF estimation. For peptide  
673 identification, MS/MS spectra were searched against the database using the Sequest HT  
674 node in Proteome Discoverer version 2.0.0.802 (Thermo Fisher Scientific) and peptide  
675 spectral matches were filtered using the Percolator node as described by Petersen et al.<sup>98</sup>.  
676 The peptide-spectrum match (PSM) files generated by Proteome Discoverer were exported  
677 in tab-delimited text format. The 1D-LC-MS/MS raw files were converted to mzML format  
678 using the MSConvertGUI available in the ProteoWizard tool suite<sup>100</sup>. Only the MS<sup>1</sup> spectra  
679 were retained in the mzML files and the spectra were converted to centroided data by  
680 Vendor algorithm peak picking. The PSM and mzML files were used as input for the Calis-p  
681 software (<https://sourceforge.net/projects/calis-p/>) to extract peptide isotope distributions and  
682 to compute the direct Protein-SIF  $\delta^{13}\text{C}$  value for each species<sup>33</sup>. The direct Protein-SIF  $\delta^{13}\text{C}$   
683 values were corrected for instrument fragmentation by applying the offset determined by  
684 comparing the direct Protein-SIF  $\delta^{13}\text{C}$  value of the reference material with its known  $\delta^{13}\text{C}$   
685 value.

## 686 **Data availability**

687 The metagenomic and metatranscriptomic raw reads are available in the European  
688 Nucleotide Archive under Study Accession Number: ERZ772703, PRJEB23286,  
689 PRJEB23284 and PRJEB19882.



## 690 References

- 691 1. Rosgaard, L., de Porcellinis, A. J., Jacobsen, J. H., Frigaard, N.-U. & Sakuragi, Y.  
692 Bioengineering of carbon fixation, biofuels, and biochemicals in cyanobacteria and  
693 plants. *J. Biotechnol.* **162**, 134–147 (2012).
- 694 2. Hügler, M. & Sievert, S. M. Beyond the Calvin Cycle: Autotrophic Carbon Fixation in  
695 the Ocean. *Ann. Rev. Mar. Sci.* **3**, 261–289 (2011).
- 696 3. Schwander, T., Schada von Borzyskowski, L., Burgener, S., Cortina, N. S. & Erb, T. J.  
697 A synthetic pathway for the fixation of carbon dioxide in vitro. *Science* **354**, 900–904  
698 (2016).
- 699 4. Figueroa, I. A. *et al.* Metagenomics-guided analysis of microbial  
700 chemolithoautotrophic phosphite oxidation yields evidence of a seventh natural CO<sub>2</sub>  
701 fixation pathway. *Proc. Natl. Acad. Sci.* **115**, E92–E101 (2018).
- 702 5. Raven, J. Contributions of anoxygenic and oxygenic phototrophy and  
703 chemolithotrophy to carbon and oxygen fluxes in aquatic environments. *Aquat.*  
704 *Microb. Ecol.* **56**, 177–192 (2009).
- 705 6. Falkowski, P. G., Fenchel, T. & Delong, E. F. The Microbial Engines That Drive Earth's  
706 Biogeochemical Cycles. *Science* **320**, 1034–1039 (2008).
- 707 7. Bassham, J. A. *et al.* The Path of Carbon in Photosynthesis. XXI. The Cyclic  
708 Regeneration of Carbon Dioxide Acceptor 1. *J. Am. Chem. Soc.* **76**, 1760–1770  
709 (1954).
- 710 8. Raven, J. A. Rubisco: still the most abundant protein of Earth? *New Phytol.* **198**, 1–3  
711 (2013).
- 712 9. Erb, T. J. & Zarzycki, J. A short history of RubisCO: the rise and fall (?) of Nature's  
713 predominant CO<sub>2</sub> fixing enzyme. *Curr. Opin. Biotechnol.* **49**, 100–107 (2018).
- 714 10. Evans, M. C., Buchanan, B. B. & Arnon, D. I. A new ferredoxin-dependent carbon  
715 reduction cycle in a photosynthetic bacterium. *Proc. Natl. Acad. Sci.* **55**, 928–934  
716 (1966).
- 717 11. Mall, A. *et al.* Reversibility of citrate synthase allows autotrophic growth of a  
718 thermophilic bacterium. *Science* **359**, 563–567 (2018).
- 719 12. Nunoura, T. *et al.* A primordial and reversible TCA cycle in a facultatively  
720 chemolithoautotrophic thermophile. *Science* **359**, 559–563 (2018).
- 721 13. Waite, D. W. *et al.* Comparative Genomic Analysis of the Class Epsilonproteobacteria  
722 and Proposed Reclassification to Epsilonbacteraeota (phyl. nov.). *Front. Microbiol.* **8**,  
723 (2017).
- 724 14. Waite, D. W. *et al.* Addendum: Comparative Genomic Analysis of the Class  
725 Epsilonproteobacteria and Proposed Reclassification to Epsilonbacteraeota (phyl.  
726 nov.). *Front. Microbiol.* **9**, (2018).
- 727 15. Smith, C. Chemosynthesis in the deep-sea: life without the sun. *Biogeosciences*  
728 *Discuss.* **9**, 17037–17052 (2012).

- 729 16. Van Dover, C. L. *The Ecology of Deep-sea Hydrothermal Vents*. (Princeton University  
730 Press, 2000).
- 731 17. Campbell, B. J., Engel, A. S., Porter, M. L. & Takai, K. The versatile epsilon-  
732 proteobacteria: key players in sulphidic habitats. *Nat. Rev. Microbiol.* **4**, 458–68  
733 (2006).
- 734 18. Nakagawa, S. & Takai, K. Deep-sea vent chemoautotrophs: Diversity, biochemistry  
735 and ecological significance. *FEMS Microbiol. Ecol.* **65**, 1–14 (2008).
- 736 19. Sievert, S. & Vetriani, C. Chemoautotrophy at Deep-Sea Vents: Past, Present, and  
737 Future. *Oceanography* **25**, 218–233 (2012).
- 738 20. Reeves, E. P. *et al.* Microbial lipids reveal carbon assimilation patterns on  
739 hydrothermal sulfide chimneys. *Environ. Microbiol.* **16**, 3515–3532 (2014).
- 740 21. Pop Ristova, P., Wenzhöfer, F., Ramette, A., Felden, J. & Boetius, A. Spatial scales of  
741 bacterial community diversity at cold seeps (Eastern Mediterranean Sea). *ISME J.* **9**,  
742 1–13 (2014).
- 743 22. Sievert, S. M., Hügler, M., Taylor, C. D. & Wirsén, C. O. Sulfur Oxidation at Deep-Sea  
744 Hydrothermal Vents in *Microbial Sulfur Metabolism* 238–258 (Springer Berlin  
745 Heidelberg, 2008).
- 746 23. Meier, D. V *et al.* Niche partitioning of diverse sulfur-oxidizing bacteria at hydrothermal  
747 vents. *ISME J.* **11**, 1545–1558 (2017).
- 748 24. Marshall, K. T. & Morris, R. M. Isolation of an aerobic sulfur oxidizer from the  
749 SUP05/Arctic96BD-19 clade. *ISME J.* **7**, 452–455 (2013).
- 750 25. Inagaki, F., Takai, K., Nealson, K. H. & Horikoshi, K. *Sulfurovum lithotrophicum* gen.  
751 nov., sp. nov., a novel sulfur-oxidizing chemolithoautotroph within the E-  
752 Proteobacteria isolated from Okinawa Trough hydrothermal sediments. *Int. J. Syst.*  
753 *Evol. Microbiol.* **54**, 1477–1482 (2004).
- 754 26. Yamamoto, M. & Takai, K. Sulfur Metabolisms in Epsilon- and Gamma-Proteobacteria  
755 in Deep-Sea Hydrothermal Fields. *Front. Microbiol.* **2**, 192 (2011).
- 756 27. Dubilier, N., Bergin, C. & Lott, C. Symbiotic diversity in marine animals: the art of  
757 harnessing chemosynthesis. *Nat. Rev. Microbiol.* **6**, 725–40 (2008).
- 758 28. Galkin, S. V. Structure of Hydrothermal Vent Communities in *Trace Metal*  
759 *Biogeochemistry and Ecology of Deep-Sea Hydrothermal Vent Systems* (eds. Galkin,  
760 S. V. & Demina, L. L.) 41–53 (Springer International Publishing Switzerland, 2016).
- 761 29. Petersen, J. M. *et al.* Dual symbiosis of the vent shrimp *Rimicaris exoculata* with  
762 filamentous gamma- and epsilonproteobacteria at four Mid-Atlantic Ridge  
763 hydrothermal vent fields. *Environ. Microbiol.* **12**, 2204–2218 (2010).
- 764 30. Beinart, R. A. *et al.* Evidence for the role of endosymbionts in regional-scale habitat  
765 partitioning by hydrothermal vent symbioses. *Proc. Natl. Acad. Sci.* **109**, E3241–  
766 E3250 (2012).
- 767 31. Duperron, S., Lorion, J., Samadi, S., Gros, O. & Gaill, F. Symbioses between deep-  
768 sea mussels (Mytilidae: Bathymodiolinae) and chemosynthetic bacteria: diversity,  
769 function and evolution. *C. R. Biol.* **332**, 298–310 (2009).

- 770 32. Assié, A. *et al.* A specific and widespread association between deep-sea  
771 *Bathymodiolus* mussels and a novel family of Epsilonproteobacteria. *Environ.*  
772 *Microbiol. Rep.* **8**, 805–813 (2016).
- 773 33. Kleiner, M. *et al.* Metaproteomics method to determine carbon sources and  
774 assimilation pathways of species in microbial communities. *Proc. Natl. Acad. Sci.* **115**,  
775 E5576–E5584 (2018).
- 776 34. Goris, J. *et al.* DNA–DNA hybridization values and their relationship to whole-genome  
777 sequence similarities. *Int. J. Syst. Evol. Microbiol.* **57**, 81–91 (2007).
- 778 35. Konstantinidis, K. T. & Tiedje, J. M. Towards a Genome-Based Taxonomy for  
779 Prokaryotes. *J. Bacteriol.* **187**, 6258–6264 (2005).
- 780 36. Yarza, P. *et al.* Uniting the classification of cultured and uncultured bacteria and  
781 archaea using 16S rRNA gene sequences. *Nat. Rev. Microbiol.* **12**, 635–645 (2014).
- 782 37. Rodriguez-R, L. M. & Konstantinidis, K. T. Bypassing cultivation to identify bacterial  
783 species. *Microbe* **9**, 111–118 (2014).
- 784 38. Rosenthal, B. *et al.* Evidence for the bacterial origin of genes encoding fermentation  
785 enzymes of the amitochondriate protozoan parasite *Entamoeba histolytica*. *J.*  
786 *Bacteriol.* **179**, 3736–3745 (1997).
- 787 39. Kleiner, M. *et al.* Assessing species biomass contributions in microbial communities  
788 via metaproteomics. *Nat. Commun.* **8**, 1558 (2017).
- 789 40. Pearson, A. Pathways of Carbon Assimilation and Their Impact on Organic Matter  
790 Values  $\delta^{13}\text{C}$  in *Handbook of Hydrocarbon and Lipid Microbiology* (ed. Timmis, K. N.)  
791 143–156 (Springer Berlin Heidelberg, 2010).
- 792 41. MacAvoy, S. E., Carney, R. S., Morgan, E. & Macko, S. a. Stable Isotope Variation  
793 Among the Mussel *Bathymodiolus childressi* and Associated Heterotrophic Fauna at  
794 Four Cold-Seep Communities in the Gulf of Mexico. *J. Shellfish Res.* **27**, 147–151  
795 (2008).
- 796 42. Sassen, R. *et al.* Thermogenic gas hydrates and hydrocarbon gases in complex  
797 chemosynthetic communities, Gulf of Mexico continental slope. *Org. Geochem.* **30**,  
798 485–497 (1999).
- 799 43. Petersen, J. M. & Dubilier, N. Methanotrophic symbioses in marine invertebrates.  
800 *Environ. Microbiol. Rep.* **1**, 319–335 (2009).
- 801 44. Riekenberg, P., Carney, R. & Fry, B. Trophic plasticity of the methanotrophic mussel  
802 *Bathymodiolus childressi* in the Gulf of Mexico. *Mar. Ecol. Prog. Ser.* **547**, 91–106  
803 (2016).
- 804 45. Parks, D. H., Imelfort, M., Skennerton, C. T., Hugenholtz, P. & Tyson, G. W. CheckM :  
805 assessing the quality of microbial genomes recovered from isolates , single cells , and  
806 metagenomes. *Genome Res.* **25**, 1043–1055 (2015).
- 807 46. Li, Y., Liles, M. R. & Halanych, K. M. Endosymbiont genomes yield clues of tubeworm  
808 success. *ISME J.* (2018).
- 809 47. Robidart, J. C. *et al.* Metabolic versatility of the *Riftia pachyptila* endosymbiont  
810 revealed through metagenomics. *Environ. Microbiol.* **10**, 727–737 (2008).

- 811 48. Markert, S. *et al.* Physiological Proteomics of the Uncultured Endosymbiont of *Riftia*  
812 *pachyptila*. *Science* **315**, 247–250 (2007).
- 813 49. Winkel, M. *et al.* Single-cell Sequencing of Thiomargarita Reveals Genomic Flexibility  
814 for Adaptation to Dynamic Redox Conditions. *Front. Microbiol.* **7**, (2016).
- 815 50. Flood, B. E. *et al.* Single-Cell (Meta-)Genomics of a Dimorphic Candidatus  
816 Thiomargarita nelsonii Reveals Genomic Plasticity. *Front. Microbiol.* **7**, (2016).
- 817 51. MacGregor, B. J., Biddle, J. F., Harbort, C., Matthyse, A. G. & Teske, A. Sulfide  
818 oxidation, nitrate respiration, carbon acquisition, and electron transport pathways  
819 suggested by the draft genome of a single orange Guaymas Basin Beggiatoa (Cand.  
820 Maribeggiatoa) sp. filament. *Mar. Genomics* **11**, 53–65 (2013).
- 821 52. Rubin Blum, M., Dubilier, N. & Kleiner, M. Genetic evidence for two carbon fixation  
822 pathways in symbiotic and free-living bacteria: The Calvin-Benson-Bassham cycle  
823 and the reverse tricarboxylic acid cycle. *bioRxiv* (2018).
- 824 53. Peden, J. F. Analysis of codon usage. *Biosystems.* **106**, 45–50 (2011).
- 825 54. Kleiner, M., Young, J. C., Shah, M., Verberkmoes, N. C. & Dubilier, N. Metaproteomics  
826 reveals abundant transposase expression in mutualistic endosymbionts. *MBio* **4**,  
827 (2013).
- 828 55. Hamann, E. *et al.* Environmental Breviatea harbour mutualistic *Arcobacter* epibionts.  
829 *Nature* **534**, 254–258 (2016).
- 830 56. Zhang, Y. & Sievert, S. M. Pan-genome analyses identify lineage- and niche-specific  
831 markers of evolution and adaptation in Epsilonproteobacteria. *Front. Microbiol.* **5**, 110  
832 (2014).
- 833 57. Hugler, M., Wirsen, C. O., Fuchs, G., Taylor, C. D. & Sievert, S. M. Evidence for  
834 Autotrophic CO<sub>2</sub> Fixation via the Reductive Tricarboxylic Acid Cycle by Members of  
835 the  $\epsilon$ -Subdivision of Proteobacteria. *J. Bacteriol.* **187**, 3020–3027 (2005).
- 836 58. Ragsdale, S. W. Pyruvate ferredoxin oxidoreductase and its radical intermediate.  
837 *Chem. Rev.* **103**, 2333–2346 (2003).
- 838 59. Imlay, J. A. Iron-sulphur clusters and the problem with oxygen. *Mol. Microbiol.* **59**,  
839 1073–1082 (2006).
- 840 60. Berg, I. A. Ecological aspects of the distribution of different autotrophic CO<sub>2</sub> fixation  
841 pathways. *Appl. Environ. Microbiol.* **77**, 1925–1936 (2011).
- 842 61. Pjevac, P. *et al.* Metaproteogenomic Profiling of Microbial Communities Colonizing  
843 Actively Venting Hydrothermal Chimneys. *Front. Microbiol.* **9**, (2018).
- 844 62. Kalenitchenko, D. *et al.* Ecological succession leads to chemosynthesis in mats  
845 colonizing wood in sea water. *ISME J.* **10**, 2246–2258 (2016).
- 846 63. Smillie, C. S. *et al.* Ecology drives a global network of gene exchange connecting the  
847 human microbiome. *Nature* **480**, 241–244 (2011).
- 848 64. Gilbreath, J. J., Cody, W. L., Merrell, D. S. & Hendrixson, D. R. Change Is Good:  
849 Variations in Common Biological Mechanisms in the Epsilonproteobacterial Genera  
850 *Campylobacter* and *Helicobacter*. *Microbiol. Mol. Biol. Rev.* **75**, 84–132 (2011).

- 851 65. Porcelli, I., Reuter, M., Pearson, B. M., Wilhelm, T. & van Vliet, A. H. M. Parallel  
852 evolution of genome structure and transcriptional landscape in the  
853 Epsilonproteobacteria. *BMC Genomics* **14**, 616 (2013).
- 854 66. Anderson, R. E. *et al.* Genomic variation in microbial populations inhabiting the  
855 marine seafloor at deep-sea hydrothermal vents. *Nat. Commun.* **8**, 1114 (2017).
- 856 67. Nakagawa, S. & Takaki, Y. Nonpathogenic Epsilonproteobacteria in *Encyclopedia of*  
857 *Life Sciences* 1–11 (John Wiley & Sons, Ltd, 2009).
- 858 68. Nakagawa, S. *et al.* Deep-sea vent -proteobacterial genomes provide insights into  
859 emergence of pathogens. *Proc. Natl. Acad. Sci.* **104**, 12146–12150 (2007).
- 860 69. Antonovsky, N. *et al.* Sugar Synthesis from CO<sub>2</sub> in *Escherichia coli*. *Cell* **166**, 115–125  
861 (2016).
- 862 70. Bar-Even, A., Noor, E., Lewis, N. E. & Milo, R. Design and analysis of synthetic  
863 carbon fixation pathways. *Proc. Natl. Acad. Sci.* **107**, 8889–8894 (2010).
- 864 71. Zwirgmaier, K. *et al.* Linking regional variation of epibiotic bacterial diversity and  
865 trophic ecology in a new species of Kiwaidae (Decapoda, Anomura) from East Scotia  
866 Ridge (Antarctica) hydrothermal vents. *Microbiologyopen* **4**, 136–150 (2015).
- 867 72. Rogge, A. *et al.* Success of chemolithoautotrophic SUP05 and Sulfurimonas GD17  
868 cells in pelagic Baltic Sea redox zones is facilitated by their lifestyles as K- and r -  
869 strategists. *Environ. Microbiol.* **19**, 2495–2506 (2017).
- 870 73. Pjevac, P., Kamyshny, A., Dykma, S. & Mußmann, M. Microbial consumption of zero-  
871 valence sulfur in marine benthic habitats. *Environ. Microbiol.* **16**, 3416–3430 (2014).
- 872 74. Kreimer, A., Borenstein, E., Gophna, U. & Ruppin, E. The evolution of modularity in  
873 bacterial metabolic networks. *Proc. Natl. Acad. Sci.* **105**, 6976–6981 (2008).
- 874 75. Levin, L. A., Mendoza, G. F., Konotchick, T. & Lee, R. Macrobenthos community  
875 structure and trophic relationships within active and inactive Pacific hydrothermal  
876 sediments. *Deep Sea Res. Part II Top. Stud. Oceanogr.* **56**, 1632–1648 (2009).
- 877 76. Zhang, C. L. *et al.* Lipid biomarkers and carbon-isotopes of modern travertine  
878 deposits (Yellowstone National Park, USA): Implications for biogeochemical dynamics  
879 in hot-spring systems. *Geochim. Cosmochim. Acta* **68**, 3157–3169 (2004).
- 880 77. Kelley, C. a, Coffin, R. B. & Cifuentes, L. a. Stable isotope evidence for alternative  
881 bacterial carbon sources in the Gulf of Mexico. *Limnol. Oceanogr.* **43**, 1962–1969  
882 (1998).
- 883 78. Fry, B. & Sherr, E. B.  $\delta^{13}\text{C}$  Measurements as Indicators of Carbon Flow in Marine and  
884 Freshwater Ecosystems in *Stable Isotopes in Ecological Research* (ed. Rundel P.W.,  
885 Ehleringer J.R., N. K. A.) 196–229 (Springer, New York, NY, 1989).
- 886 79. Zhou, J., Bruns, M. A. & Tiedje, J. M. DNA recovery from soils of diverse composition.  
887 *Appl. Environ. Microbiol.* **62**, 316–322 (1996).
- 888 80. Li, D., Liu, C. M., Luo, R., Sadakane, K. & Lam, T. W. MEGAHIT: An ultra-fast single-  
889 node solution for large and complex metagenomics assembly via succinct de Bruijn  
890 graph. *Bioinformatics* **31**, 1674–1676 (2014).
- 891 81. Strous, M., Kraft, B., Bisdorf, R. & Tegetmeyer, H. E. The binning of metagenomic



- 892 contigs for microbial physiology of mixed cultures. *Front. Microbiol.* **3**, 1–11 (2012).
- 893 82. Bankevich, A. *et al.* SPAdes: A New Genome Assembly Algorithm and Its Applications  
894 to Single-Cell Sequencing. *J. Comput. Biol.* **19**, 455–477 (2012).
- 895 83. Aziz, R. K. *et al.* The RAST Server: Rapid Annotations using Subsystems Technology.  
896 *BMC Genomics* **9**, 75 (2008).
- 897 84. Meyer, F. *et al.* The metagenomics RAST server – a public resource for the automatic  
898 phylogenetic and functional analysis of metagenomes. *BMC Bioinformatics* **9**, 386  
899 (2008).
- 900 85. Markowitz, V. M. *et al.* IMG 4 version of the integrated microbial genomes  
901 comparative analysis system. *Nucleic Acids Res.* **42**, D560–D567 (2014).
- 902 86. Rodriguez-R, L. M. & Konstantinidis, K. T. The enveomics collection : a toolbox for  
903 specialized analyses of microbial genomes and metagenomes. *Peer J Prepr.* **4**,  
904 e1900v1 (2016).
- 905 87. Rubin-Blum, M. *et al.* Short-chain alkanes fuel mussel and sponge *Cycloclasticus*  
906 symbionts from deep-sea gas and oil seeps. *Nat. Microbiol.* **2**, 17093 (2017).
- 907 88. Liao, Y., Smyth, G. K. & Shi, W. FeatureCounts: An efficient general purpose program  
908 for assigning sequence reads to genomic features. *Bioinformatics* **30**, 923–930  
909 (2014).
- 910 89. Robinson, M. D., McCarthy, D. J. & Smyth, G. K. edgeR: a Bioconductor package for  
911 differential expression analysis of digital gene expression data. *Bioinformatics* **26**,  
912 139–140 (2010).
- 913 90. Wu, M. & Scott, A. J. Phylogenomic analysis of bacterial and archaeal sequences with  
914 AMPHORA2. *Bioinformatics* **28**, 1033–1034 (2012).
- 915 91. Edgar, R. C. MUSCLE: multiple sequence alignment with high accuracy and high  
916 throughput. *Nucleic Acid Res.* **32**, 1792–1797 (2004).
- 917 92. Stamatakis, A. RAxML version 8: A tool for phylogenetic analysis and post-analysis of  
918 large phylogenies. *Bioinformatics* **30**, 1312–1313 (2014).
- 919 93. Kearse, M. *et al.* Geneious Basic: an integrated and extendable desktop software  
920 platform for the organization and analysis of sequence data. *Bioinformatics* **28**, 1647–  
921 9 (2012).
- 922 94. Darriba, D., Taboada, G. L., Doallo, R. & Posada, D. ProtTest 3: fast selection of best-  
923 fit models of protein evolution. *Bioinformatics* **27**, 1164–1165 (2011).
- 924 95. Ronquist, F. *et al.* MrBayes 3.2: Efficient Bayesian Phylogenetic Inference and Model  
925 Choice Across a Large Model Space. *Syst. Biol.* **61**, 539–542 (2012).
- 926 96. Guindon, S. *et al.* New Algorithms and Methods to Estimate Maximum-Likelihood  
927 Phylogenies: Assessing the Performance of PhyML 3.0. *Syst. Biol.* **59**, 307–321  
928 (2010).
- 929 97. Wiśniewski, J. R., Zougman, A., Nagaraj, N. & Mann, M. Universal sample preparation  
930 method for proteome analysis. *Nat. Methods* **6**, 359–362 (2009).
- 931 98. Petersen, J. M. *et al.* Chemosynthetic symbionts of marine invertebrate animals are

- 932           capable of nitrogen fixation. *Nat. Microbiol.* **2**, 16195 (2016).
- 933    99.    Zybailov, B. *et al.* Statistical analysis of membrane proteome expression changes in  
934           *Saccharomyces cerevisiae*. *J. Proteome Res.* **5**, 2339–2347 (2006).
- 935    100.   Chambers, M. C. *et al.* A cross-platform toolkit for mass spectrometry and proteomics.  
936           *Nat. Biotechnol.* **30**, 918–920 (2012).
- 937    101.   Vizcaíno, J. A. *et al.* 2016 update of the PRIDE database and its related tools. *Nucleic*  
938           *Acids Res.* **44**, D447–D456 (2016).
- 939

## 940 **Acknowledgements**

941           We would like to thank the crew and captains of the scientific vessels of the following  
942 cruises: Atlantis cruise AT26-13, Nautilus cruises NA044 and NA058 and the “Pourquoi  
943 Pas?” Biobaz cruise. We also thank the Max Planck Genome Center in Cologne for the  
944 genome and transcriptome sequencing. We are grateful to Lizbeth Sayavedra for  
945 transcriptome assembly advice and support. We also thank Brandon Seah for his help with  
946 the naming of “*Ca. Thiobarba*”. We thank Marc Strous for access to proteomics equipment.  
947 The purchase of the proteomics equipment was supported by a grant of the Canadian  
948 Foundation for Innovation to Marc Strous.

949           This work was funded by the Max Planck Society, the DFG Cluster of Excellence  
950 ‘The Ocean in the Earth System’ at MARUM (University of Bremen), a European Research  
951 Council Advanced Grant (BathyBiome, Grant 340535) and a Gordon and Betty Moore  
952 Foundation Marine Microbiology Initiative Investigator Award through Grant GBMF3811 to  
953 ND, the European Union (EU) Marie Curie Actions Initial Training Network (ITN)  
954 SYMBIOMICS (contract number 264774) and a NSF award #0801741 to Dr. Samantha Joye  
955 to fund the AT26-13 expedition to the Gulf of Mexico. JMP was supported by the Vienna  
956 Science and Technology Fund (WWTF) through project VRG14-021. MK was supported by  
957 the Natural Sciences and Engineering Research Council (NSERC) of Canada through a  
958 Banting fellowship and the NC State Chancellor’s Faculty Excellence Program Cluster on  
959 Microbiomes and Complex Microbial Communities. TH was supported through a fellowship  
960 of the German Academic Exchange Service DAAD.

961



962 **Author contributions**

963 A.A., N.L., J.P. and N.D. conceived and developed the study. A.A. and N.L analyzed  
964 data. A.A. and H.G.V. performed the metagenomic assemblies. A.A. performed  
965 transcriptome and genome analyses as well as phylogenetic reconstructions. M.K and T.H  
966 performed proteomic analyses. M.K. developed and performed isotopic fingerprinting  
967 method. N.L and A.A provided bulk Isotope analysis. N.L provided key support for isotope  
968 work and interpretations. A.M. and D.V.M. provided environmental genomic bin. H.E.T.  
969 performed genomic sequencing. S.J and M.S provided key biological samples. A.A. and N.L.  
970 wrote the manuscript with support from J.P. and N.D. All authors discussed the results and  
971 contributed to the final manuscript.
